# Supplementary material for: A Historical Collection of Termites in Ferrara: Recovery, Cataloguing and Geographical Analyses
Source: MDPI journal article supplement (doi:10.3390/insects12090793), 2021-09-04
Supplement: s1 [file s1]

Supplementary Material

# A Historical Collection of Termites in Ferrara: Recovery, Cataloguing and Geographical Analyses

Davide Curci<sup>1</sup>, Chiara Scapoli<sup>1</sup>, Maria Gabriella Marchetti<sup>1</sup>, Milvia Chicca<sup>1</sup>, Marilena Leis<sup>1</sup>, Chiara Beatrice Vicentini<sup>1</sup>, Teresa Bonacci<sup>2</sup>, Marco Pezzi<sup>1\*</sup>

<sup>1</sup> Department of Life Sciences and Biotechnology, University of Ferrara, Via L. Borsari 46, 44121, Ferrara, Italy; davide.curci@edu.unife.it (D.C.); chiara.scapoli@unife.it (C.S.); gabriella.marchetti@unife.it (M.G.M.) milvia.chicca@unife.it (M.C.); marilena.leis@unife.it (M.L.) chiara.vicentini@unife.it (C.B.V.); marco.pezzi@unife.it (M.P.)

<sup>2</sup> Department of Biology, Ecology and Earth Sciences, University of Calabria, Via P. Bucci, 87036, Arcavacata di Rende, Cosenza, Italy; teresa.bonacci@unical.it (T.B.)

\* Correspondence: marco.pezzi@unife.it

**Citation:** Curci, D.; Scapoli, C.; Marchetti, M.G.; Chicca, M.; Leis, M.; Vicentini, C.B.; Bonacci, T.; Pezzi, M. A Historical Collection of Termites in Ferrara: Recovery, Cataloguing and Geographical Analyses. *Insects* **2021**, *12*, 793.  
<https://doi.org/10.3390/insects12090793>

Academic Editor: Barbara Manachini and Stefano Vanin

Received: 28 July 2021

Accepted: 31 August 2021

Published: 4 September 2021

**Publisher's Note:** MDPI stays neutral with regard to jurisdictional claims in published maps and institutional affiliations.

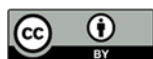

**Copyright:** © 2021 by the authors. Submitted for possible open access publication under the terms and conditions of the Creative Commons Attribution (CC BY) license (<https://creativecommons.org/licenses/by/4.0/>).

**Table S1.** Termite specimens from Springhetti Collection. Jar 1: *Reticulitermes lucifugus*, laboratory specimens. Abbreviations: A, alates; E, ergatoids; N, neanids; P, pseudergates; S, soldiers; R, royals; W: workers. Number of individuals of each caste within brackets.

| Test tube code | Number of individuals | Castes            |
|----------------|-----------------------|-------------------|
| V1-P01         | 19                    | E(9); W(10)       |
| V1-P02         | 1                     | R(1)              |
| V1-P03         | 75                    | S(1); W(74)       |
| V1-P04         | 2                     | A(2)              |
| V1-P05         | 2                     | S(2)              |
| V1-P06         | 13                    | S(6); W(7)        |
| V1-P07         | 7                     | S(7)              |
| V1-P08         | 9                     | W(9)              |
| V1-P09         | 22                    | N(22)             |
| V1-P10         | 29                    | N(29)             |
| V1-P11         | 4                     | N(4)              |
| V1-P12         | 30                    | N(30)             |
| V1-P13         | 6                     | S(6)              |
| V1-P14         | 23                    | E(5); N(7); W(11) |
| V1-P15         | 37                    | N(37)             |
| V1-P16         | 39                    | S(21); W(18);     |
| V1-P17         | 54                    | W(54)             |
| V1-P18         | 43                    | E(9); N(26); W(8) |

**Table S2.** Termite specimens from Springhetti Collection. Jar 2: Italian termites, *Kaloterms flavicollis* (*K. flavicollis*), *Reticulitermes lucifugus* (*R. lucifugus*). \*Specimens collected in the wild and afterwards kept in laboratory. All other abbreviations as in Table S1.

| Test tube code | Species               | Number of individuals | Castes                     | Year of collection | Administrative Region | Municipality/Locality                                |
|----------------|-----------------------|-----------------------|----------------------------|--------------------|-----------------------|------------------------------------------------------|
| V2-P01         | <i>K. flavicollis</i> | 30                    | A(9); P(11); S(10);        | --                 | Emilia-Romagna        | Ferrara                                              |
| V2-P02         | <i>R. lucifugus</i>   | 175                   | N(1); S(6); W(168)         | --                 | Lazio                 | Antrodoco (Rieti)                                    |
| V2-P03         | <i>R. lucifugus</i>   | 133                   | N(3); S(19);<br>W(111)     | 1987               | Emilia-Romagna        | Bagnacavallo (Ravenna)                               |
| V2-P04         | <i>R. lucifugus</i>   | 13                    | S(10); W(3)                | 1977               | Friuli-Venezia Giulia | Udine                                                |
| V2-P05         | <i>K. flavicollis</i> | 5                     | S(5)                       | 1976               | Liguria               | Marinella Sarzana (Sarzana, La Spezia)               |
| V2-P06         | <i>R. lucifugus</i>   | 70                    | A(70)                      | 1954               | Lazio                 | Roma                                                 |
| V2-P07         | <i>R. lucifugus</i>   | 2                     | A(2)                       | --                 | Emilia-Romagna        | Bagnacavallo (Ravenna)                               |
| V2-P08         | <i>R. lucifugus</i>   | 8                     | S(2); W(6)                 | 1988               | Liguria               | Camogli (Genova)                                     |
| V2-P09         | <i>R. lucifugus</i>   | 72                    | S(5); W(67)                | 1966               | Tuscany               | Livorno                                              |
| V2-P10         | <i>K. flavicollis</i> | 41                    | A(28); P(11); S(2)         | --                 | Emilia-Romagna        | Ferrara                                              |
| V2-P11         | <i>R. lucifugus</i>   | 878                   | S(9); W(869)               | 1959               | Lombardy              | Lodi                                                 |
| V2-P12         | <i>K. flavicollis</i> | 1                     | A(1)                       | --                 | Liguria               | Manarola (Riomaggiore, La Spezia)                    |
| V2-P13         | <i>K. flavicollis</i> | 1                     | A(1)                       | 1972               | Emilia-Romagna        | Pineta di San Vitale (Ravenna)                       |
| V2-P14         | <i>K. flavicollis</i> | 18                    | P(10); S(8)                | --                 | Emilia-Romagna        | Ferrara                                              |
| V2-P15         | <i>R. lucifugus</i>   | 13                    | S(6); W(7)                 | --                 | Tuscany               | Barberino di Mugello (Firenze)                       |
| V2-P16         | <i>R. lucifugus</i>   | 22                    | N(6); S(8); W(8)           | 1966               | Tuscany               | Pisa                                                 |
| V2-P17         | <i>R. lucifugus</i>   | 15                    | N(5); S(4); W(6)           | --                 | Lombardy              | Lodi                                                 |
| V2-P18         | <i>R. lucifugus</i>   | 16                    | S(9); W(7)                 | --                 | Tuscany               | Barberino di Mugello (Firenze)                       |
| V2-P19         | <i>R. lucifugus</i>   | 14                    | S(1); W(13)                | 1964               | Lazio                 | Istituto Patologia del Libro (Roma)*                 |
| V2-P20         | <i>R. lucifugus</i>   | 14                    | S(8); W(6)                 | 1958               | Marche                | Castel Raimondo (Macerata)                           |
| V2-P21         | <i>R. lucifugus</i>   | 102                   | N(11); S(1); W(90)         | 1964               | Emilia-Romagna        | Salsomaggiore Terme (Parma)                          |
| V2-P22         | <i>K. flavicollis</i> | 29                    | A(1); P(26); S(2)          | 1975               | Emilia-Romagna        | San Fortunato (Rimini)                               |
| V2-P23         | <i>K. flavicollis</i> | 11                    | P(9); S(2)                 | 1974               | Emilia-Romagna        | Masi Torello (Ferrara)                               |
| V2-P24         | <i>R. lucifugus</i>   | 31                    | S(5); W(26)                | --                 | Tuscany               | Pineta del Tombolo (Grosseto)                        |
| V2-P25         | <i>R. lucifugus</i>   | 4                     | W(4)                       | 1977               | Tuscany               | Lido di Camaiore (Camaiore, Lucca)                   |
| V2-P26         | <i>R. lucifugus</i>   | 33                    | S(4); W(29)                | 1964               | Emilia-Romagna        | Salsomaggiore Terme (Parma)                          |
| V2-P27         | <i>R. lucifugus</i>   | 1                     | W(1)                       | 1987               | Emilia-Romagna        | Bagnacavallo (Ravenna)                               |
| V2-P28         | <i>R. lucifugus</i>   | 23                    | N(5); W(18)                | --                 | Tuscany               | Barberino Val d'Elsa (Barberino Tavarnelle, Firenze) |
| V2-P29         | <i>R. lucifugus</i>   | 22                    | S(9); W(13)                | 1971               | Tuscany               | Bagni di Lucca (Lucca)                               |
| V2-P30         | <i>R. lucifugus</i>   | 27                    | A(2); N(2); S(5);<br>W(18) | --                 | Emilia-Romagna        | Bagnacavallo (Ravenna)*                              |
| V2-P31         | <i>R. lucifugus</i>   | 36                    | S(13); W(23)               | --                 | Tuscany               | Poggibonsi (Siena)                                   |
| V2-P32         | <i>R. lucifugus</i>   | 19                    | S(9); W(10)                | --                 | Tuscany               | San Donato (Reggello, Firenze)                       |
| V2-P33         | <i>R. lucifugus</i>   | 46                    | N(3); S(4); W(39)          | 1987               | Emilia-Romagna        | Bagnacavallo (Ravenna)                               |
| V2-P34         | <i>R. lucifugus</i>   | 39                    | A(2); S(7); W(30)          | --                 | Umbria                | Todi (Perugia)                                       |
| V2-P35         | <i>R. lucifugus</i>   | 71                    | S(13); W(58)               | 1966               | Tuscany               | Livorno                                              |
| V2-P36         | <i>R. lucifugus</i>   | 169                   | W(169)                     | 1959               | Lombardy              | Lodi                                                 |
| V2-P37         | <i>R. lucifugus</i>   | 111                   | S(7); W(104)               | 1959               | Lombardy              | Lodi                                                 |
| V2-P38         | <i>R. lucifugus</i>   | 35                    | S(9); W(26)                | 1966               | Tuscany               | Livorno                                              |

**Table S3.** Termite specimens from Springhetti Collection. Jar 3: Italian termites, *R. lucifugus*. All abbreviations as in Tables S1 and S2.

| Test tube code | Number of individuals | Castes               | Year of collection | Administrative Region | Municipality/Locality                             |
|----------------|-----------------------|----------------------|--------------------|-----------------------|---------------------------------------------------|
| V3-P01         | 424                   | N(108); S(1); W(315) | 1953               | Apulia                | Gallipoli (Lecce)                                 |
| V3-P02         | 18                    | S(1); W(17)          | 1973               | Apulia                | Manfredonia (Foggia)                              |
| V3-P03         | 47                    | S(10); W(37)         | 1975               | Apulia                | Leuca (Lecce)                                     |
| V3-P04         | 22                    | N(9); S(13)          | 1983               | Apulia                | Squinzano (Lecce)                                 |
| V3-P05         | 14                    | S(1); W(13)          | 1965               | Apulia                | Rocchetta Sant'Antonio (Foggia)                   |
| V3-P06         | 33                    | S(1); W(32)          | 1973               | Apulia                | Bosco Quarto (Monte Sant'Angelo, Foggia)          |
| V3-P07         | 31                    | W(31)                | 1973               | Apulia                | Monte Sant'Angelo (Foggia)                        |
| V3-P08         | 19                    | E(2); S(1); W(16)    | --                 | Apulia                | Squinzano (Lecce)*                                |
| V3-P09         | 38                    | W(38)                | 1973               | Apulia                | Monte Sant'Angelo (Foggia)                        |
| V3-P10         | 4                     | S(1); W(3)           | 1973               | Apulia                | Peschici (Foggia)                                 |
| V3-P11         | 15                    | S(2); W(13)          | 1973               | Apulia                | Monte Sant'Angelo (Foggia)                        |
| V3-P12         | 47                    | S(2); W(45)          | 1973               | Apulia                | Bosco Quarto (Monte Sant'Angelo, Foggia)          |
| V3-P13         | 99                    | S(1); W(98)          | 1973               | Apulia                | Funno (San Giovanni Rotondo, Foggia)              |
| V3-P14         | 11                    | S(2); W(9)           | 1973               | Apulia                | Funno (San Giovanni Rotondo, Foggia)              |
| V3-P15         | 43                    | N(27); S(1); W(15)   | 1973               | Apulia                | Monte Sant'Angelo (Foggia)                        |
| V3-P16         | 77                    | N(1); W(76)          | 1973               | Apulia                | Monte Sant'Angelo (Foggia)                        |
| V3-P17         | 13                    | S(1); W(12)          | 1964               | Apulia                | Foggia                                            |
| V3-P18         | 64                    | N(36); S(5); W(23)   | 1973               | Apulia                | Mattinata (Foggia)                                |
| V3-P19         | 55                    | S(2); W(53)          | 1973               | Apulia                | Mattinata (Foggia)                                |
| V3-P20         | 65                    | S(4); W(61)          | 1975               | Apulia                | Galatone (Lecce)                                  |
| V3-P21         | 121                   | N(15); S(10); W(96)  | 1973               | Apulia                | Monte Sant'Angelo (Foggia)                        |
| V3-P22         | 40                    | S(3); W(37)          | 1973               | Apulia                | San Giovanni Rotondo (Foggia)                     |
| V3-P23         | 24                    | S(3); W(21)          | 1960               | Basilicata            | Maratea (Potenza)                                 |
| V3-P24         | 11                    | S(11)                | 1964               | Basilicata            | Melfi (Potenza)                                   |
| V3-P25         | 12                    | N(5); W(7)           | 1964               | Basilicata            | Garaguso (Matera)                                 |
| V3-P26         | 1                     | W(1)                 | --                 | Calabria              | Rende (Cosenza)                                   |
| V3-P27         | 9                     | N(8); W(1)           | --                 | Calabria              | Belvedere Spinello (Crotone)                      |
| V3-P28         | 3                     | W(3)                 | --                 | Calabria              | Pellegrina (Bagnara di Calabria, Reggio Calabria) |
| V3-P29         | 3                     | S(1); W(2)           | --                 | Basilicata            | Rapone (Potenza)                                  |
| V3-P30         | 40                    | S(12); W(28)         | 1964               | Basilicata            | Lagonegro (Potenza)                               |
| V3-P31         | 4                     | S(1); W(3)           | 1964               | Basilicata            | Metaponto (Bernalda, Matera)                      |
| V3-P32         | 6                     | W(6)                 | 1964               | Basilicata            | Lauria (Potenza)                                  |
| V3-P33         | 4                     | S(2); W(2)           | --                 | Calabria              | Belvedere Spinello (Crotone)                      |
| V3-P34         | 13                    | N(2); S(1); W(10)    | 1964               | Basilicata            | Acerenza (Potenza)                                |
| V3-P35         | 14                    | S(7); W(7)           | 1964               | Basilicata            | Trecchina (Potenza)                               |
| V3-P36         | 3                     | S(1); W(2)           | 1980               | Calabria              | Praia a mare (Cosenza)                            |
| V3-P37         | 22                    | S(9); W(13)          | 1964               | Basilicata            | Rionero in Vulture (Potenza)                      |
| V3-P38         | 18                    | S(5); W(13)          | 1964               | Basilicata            | Moliterno (Potenza)                               |
| V3-P39         | 18                    | S(16); W(2)          | 1964               | Basilicata            | Melfi (Potenza)                                   |
| V3-P40         | 26                    | S(9); W(17)          | 1964               | Basilicata            | Melfi (Potenza)                                   |
| V3-P41         | 53                    | S(2); W(51)          | 1964               | Basilicata            | Latronico (Potenza)                               |
| V3-P42         | 29                    | S(5); W(24)          | 1964               | Basilicata            | Melfi (Potenza)                                   |
| V3-P43         | 93                    | S(6); W(87)          | 1975               | Apulia                | Squinzano (Lecce)                                 |
| V3-P44         | 162                   | S(1); W(161)         | 1968               | Apulia                | Manduria (Taranto)                                |

**Table S4.** Termite specimens from Springhetti Collection. Jar 4: Italian termites, *R. lucifugus*. All abbreviations as in Table S1.

| Test tube code | Number of individuals | Castes             | Year of collection | Administrative Region | Municipality/Locality                        |
|----------------|-----------------------|--------------------|--------------------|-----------------------|----------------------------------------------|
| V4-P01         | 11                    | A(9); W(2)         | 1981               | Campania              | Ischia (Napoli)                              |
| V4-P02         | 7                     | W(7)               | 1981               | Campania              | Barano d'Ischia (Napoli)                     |
| V4-P03         | 8                     | S(1); W(7)         | 1961               | Campania              | Procida (Napoli)                             |
| V4-P04         | 15                    | S(2); W(13)        | --                 | Campania              | Serrara Fontana (Napoli)                     |
| V4-P05         | 29                    | N(8); S(7); W(14)  | --                 | Campania              | Ischia (Napoli)                              |
| V4-P06         | 50                    | S(9); W(41)        | 1964               | Campania              | Pertosa (Salerno)                            |
| V4-P07         | 18                    | W(18)              | --                 | Molise                | Miranda (Isernia)                            |
| V4-P08         | 14                    | N(9); S(5)         | --                 | Campania              | Ischia (Napoli)                              |
| V4-P09         | 13                    | N(6); W(7)         | 1961               | Campania              | Serrara Fontana (Napoli)                     |
| V4-P10         | 53                    | N(51); W(2)        | --                 | Campania              | Ischia (Napoli)                              |
| V4-P11         | 38                    | S(6); W(32)        | 1964               | Campania              | Maddaloni (Caserta)                          |
| V4-P12         | 243                   | S(6); W(237)       | 1965               | Campania              | Lapio (Avellino)                             |
| V4-P13         | 54                    | N(11); S(6); W(37) | 1964               | Campania              | Ariano Irpino (Avellino)                     |
| V4-P14         | 4                     | A(4)               | --                 | Campania              | Monteforte Irpino (Avellino)                 |
| V4-P15         | 22                    | S(2); W(20)        | 1981               | Campania              | Testaccio d'Ischia (Barano d'Ischia, Napoli) |
| V4-P16         | 15                    | S(6); W(9)         | 1964               | Campania              | Fisciano (Salerno)                           |
| V4-P17         | 18                    | N(4); S(6); W(8)   | 1982               | Campania              | Ischia (Napoli)                              |

**Table S5.** Termite specimens from Springhetti Collection. Jar 5: Italian termites, *R. lucifugus*. All abbreviations as in Tables S1 and S2.

| Test tube code | Number of individuals | Castes              | Year of collection | Administrative Region | Municipality/Locality                                  |
|----------------|-----------------------|---------------------|--------------------|-----------------------|--------------------------------------------------------|
| V5-P01         | 92                    | S(11); W(81)        | 1980               | Sardinia              | Cala Gonone (Dorgali, Nuoro)                           |
| V5-P02         | 57                    | S(3); W(54)         | --                 | Sardinia              | Morgongiori (Oristano)                                 |
| V5-P03         | 98                    | S(7); W(91)         | --                 | Sardinia              | Spiaggia di Is Mortorius (Quartu Sant'Elena, Cagliari) |
| V5-P04         | 45                    | N(1); W(44)         | 1965               | Sardinia              | Campu Omu (Sinnai, Cagliari)                           |
| V5-P05         | 141                   | S(9); W(132)        | --                 | Sardinia              | Carbonia (Sud Sardegna)                                |
| V5-P06         | 23                    | W(23)               | --                 | Sardinia              | Sennori (Sassari)                                      |
| V5-P07         | 5                     | A(5)                | --                 | Sardinia              | Pula (Cagliari)*                                       |
| V5-P08         | 82                    | W(82)               | 1964               | Sardinia              | Pula (Cagliari)                                        |
| V5-P09         | 44                    | S(2); W(42)         | 1980               | Sardinia              | Sennori (Sassari)                                      |
| V5-P10         | 129                   | S(26); W(103)       | 1964               | Sardinia              | --                                                     |
| V5-P11         | 55                    | S(9); W(46)         | --                 | Sardinia              | Oliena (Nuoro)                                         |
| V5-P12         | 3                     | S(3)                | 1963               | Sicily                | Caltagirone (Catania)                                  |
| V5-P13         | 2                     | S(2)                | --                 | Sicily                | Polizzi Generosa (Palermo)*                            |
| V5-P14         | 1                     | W(1)                | 1963               | Sicily                | Pantano (Ribera, Agrigento)                            |
| V5-P15         | 23                    | S(1); W(22)         | 1963               | Sicily                | Monsezzato (Licata, Agrigento)                         |
| V5-P16         | 70                    | N(10); W(48); S(12) | 1965               | Sicily                | Pantelleria (Trapani)                                  |
| V5-P17         | 15                    | W(15)               | 1963               | Sicily                | Polizzi Generosa (Palermo)                             |
| V5-P18         | 8                     | S(8)                | --                 | Sicily                | Bagheria (Palermo)                                     |
| V5-P19         | 10                    | S(5); W(5)          | 1963               | Sicily                | Salina (Messina)                                       |
| V5-P20         | 15                    | W(15)               | 1963               | Sicily                | Porto Empedocle (Agrigento)                            |
| V5-P21         | 22                    | N(1); S(5); W(16)   | 1975               | Sicily                | Polizzi Generosa (Palermo)                             |
| V5-P22         | 67                    | N(1); S(10); W(56)  | 1965               | Sicily                | Pantelleria (Trapani)                                  |
| V5-P23         | 101                   | N(26); W(58); S(17) | 1965               | Sicily                | Pantelleria (Trapani)                                  |
| V5-P24         | 99                    | N(1); S(26); W(72)  | 1965               | Sicily                | Pantelleria (Trapani)                                  |
| V5-P25         | 148                   | N(46); S(14); W(88) | 1965               | Sicily                | Pantelleria (Trapani)                                  |

**Table S6.** Termite specimens from Springhetti Collection. Jar 6: Italian termites, *K. flavicollis* from Sardinia. SE, secondary reproductives. All abbreviations as in Table S1.

| Test tube code | Number of individuals | Castes                    | Year of collection | Municipality/Locality               |
|----------------|-----------------------|---------------------------|--------------------|-------------------------------------|
| V6-P01         | 11                    | S(11)                     | 1974               | Sennori (Sassari)                   |
| V6-P02         | 17                    | P(7); S(10)               | 1975               | Sennori (Sassari)                   |
| V6-P03         | 23                    | S(23)                     | 1994               | San Giovanni Suergiu (Sud Sardegna) |
| V6-P04         | 7                     | S(7)                      | 1973               | Sennori (Sassari)                   |
| V6-P05         | 20                    | A(1); N(1); P(15); S(3)   | 1965               | Sant'Antioco (Sud Sardegna)         |
| V6-P06         | 10                    | A(10)                     | --                 | Sant'Antioco (Sud Sardegna)         |
| V6-P07         | 17                    | P(7); S(10)               | --                 | San Giovanni Suergiu (Sud Sardegna) |
| V6-P08         | 20                    | P(10); S(10)              | --                 | Sant'Antioco (Sud Sardegna)         |
| V6-P09         | 11                    | S(11)                     | 1975               | Sennori (Sassari)                   |
| V6-P10         | 8                     | S(8)                      | --                 | Sant'Antioco (Sud Sardegna)         |
| V6-P11         | 10                    | S(10)                     | 1975               | Sennori (Sassari)                   |
| V6-P12         | 10                    | A(10)                     | --                 | San Giovanni Suergiu (Sud Sardegna) |
| V6-P13         | 10                    | P(8); S(2)                | --                 | Villasimius (Sud Sardegna)          |
| V6-P14         | 22                    | P(3); S(19)               | --                 | Pula (Cagliari)                     |
| V6-P15         | 132                   | A(132)                    | --                 | San Giovanni Suergiu (Sud Sardegna) |
| V6-P16         | 110                   | S(110)                    | 1994               | San Giovanni Suergiu (Sud Sardegna) |
| V6-P17         | 34                    | N(4); P(9); S(19); R(1)   | 1966               | San Giovanni Suergiu (Sud Sardegna) |
| V6-P18         | 32                    | A(13); N(1); P(6); S(12); | --                 | San Giovanni Suergiu (Sud Sardegna) |
| V6-P19         | 15                    | P(6); S(9)                | --                 | San Giovanni Suergiu (Sud Sardegna) |
| V6-P20         | 10                    | P(10)                     | --                 | Santu Lussurgiu (Oristano)          |
| V6-P21         | 18                    | P(6); S(12)               | --                 | San Giovanni Suergiu (Sud Sardegna) |
| V6-P22         | 10                    | A(10)                     | --                 | San Giovanni Suergiu (Sud Sardegna) |
| V6-P23         | 24                    | P(8); S(15); SE(1)        | 1966               | San Giovanni Suergiu (Sud Sardegna) |
| V6-P24         | 31                    | A(6); P(12); S(13)        | --                 | San Giovanni Suergiu (Sud Sardegna) |
| V6-P25         | 29                    | A(5); P(10); S(14)        | --                 | San Giovanni Suergiu (Sud Sardegna) |
| V6-P26         | 27                    | A(1); P(15); S(11)        | --                 | San Giovanni Suergiu (Sud Sardegna) |
| V6-P27         | 9                     | A(1); P(6); S(2)          | --                 | San Giovanni Suergiu (Sud Sardegna) |
| V6-P28         | 10                    | A(10)                     | --                 | San Giovanni Suergiu (Sud Sardegna) |
| V6-P29         | 12                    | P(4); S(8)                | --                 | San Giovanni Suergiu (Sud Sardegna) |
| V6-P30         | 29                    | N(1); P(9); S(19)         | --                 | San Giovanni Suergiu (Sud Sardegna) |
| V6-P31         | 47                    | P(23); S(24)              | --                 | San Giovanni Suergiu (Sud Sardegna) |
| V6-P32         | 84                    | P(13); S(71)              | 1966               | San Giovanni Suergiu (Sud Sardegna) |
| V6-P33         | 24                    | P(14); S(10)              | --                 | San Giovanni Suergiu (Sud Sardegna) |
| V6-P34         | 25                    | P(14); S(11)              | --                 | San Giovanni Suergiu (Sud Sardegna) |
| V6-P35         | 28                    | P(11); S(17)              | --                 | San Giovanni Suergiu (Sud Sardegna) |
| V6-P36         | 45                    | P(26); S(19)              | --                 | San Giovanni Suergiu (Sud Sardegna) |
| V6-P37         | 51                    | P(28); S(23)              | 1966               | San Giovanni Suergiu (Sud Sardegna) |
| V6-P38         | 12                    | P(1); S(11)               | --                 | San Giovanni Suergiu (Sud Sardegna) |
| V6-P39         | 28                    | A(3); N(2); P(21); S(2);  | --                 | San Giovanni Suergiu (Sud Sardegna) |
| V6-P40         | 20                    | P(10); S(10)              | --                 | San Giovanni Suergiu (Sud Sardegna) |
| V6-P41         | 44                    | N(6); P(15); S(23)        | 1966               | San Giovanni Suergiu (Sud Sardegna) |
| V6-P42         | 65                    | S(65)                     | --                 | San Giovanni Suergiu (Sud Sardegna) |
| V6-P43         | 44                    | A(44)                     | --                 | San Giovanni Suergiu (Sud Sardegna) |
| V6-P44         | 55                    | A(2); P(30); S(23)        | --                 | San Giovanni Suergiu (Sud Sardegna) |
| V6-P45         | 58                    | A(1); P(37); S(20)        | --                 | San Giovanni Suergiu (Sud Sardegna) |
| V6-P46         | 23                    | A(13); N(1); P(5); S(4)   | --                 | San Giovanni Suergiu (Sud Sardegna) |

**Table S7.** Termite specimens from Springhetti Collection. Jar 7: Italian termites, *K. flavicollis* from Sardinia. All abbreviations as in Tables S1 and S2.

| Test tube code | Number of individuals | Castes                  | Year of collection | Municipality/Locality                                  |
|----------------|-----------------------|-------------------------|--------------------|--------------------------------------------------------|
| V7-P01         | 40                    | P(25); S(15)            | --                 | Campu Omu (Sinnai, Cagliari)                           |
| V7-P02         | 20                    | R(1); S(19)             | --                 | Cagliari                                               |
| V7-P03         | 3                     | P(3)                    | --                 | Domusnovas (Sud Sardegna)                              |
| V7-P04         | 37                    | A(5); P(17); S(15)      | 1965               | Cagliari                                               |
| V7-P05         | 12                    | P(4); S(8)              | 1975               | Sennori (Sassari)                                      |
| V7-P06         | 30                    | P(15); S(15)            | --                 | Campu Omu (Sinnai, Cagliari)                           |
| V7-P07         | 11                    | S(11)                   | --                 | Sennori (Sassari)                                      |
| V7-P08         | 22                    | S(22)                   | --                 | Cagliari                                               |
| V7-P09         | 64                    | P(59); S(5)             | --                 | Domusnovas (Sud Sardegna)                              |
| V7-P10         | 45                    | A(12); P(21); S(12)     | 1965               | Las Plassas (Sud Sardegna)                             |
| V7-P11         | 37                    | A(5); N(2); P(7); S(23) | --                 | Cagliari                                               |
| V7-P12         | 19                    | P(11); S(8)             | --                 | Campu Omu (Sinnai, Cagliari)                           |
| V7-P13         | 17                    | A(17)                   | 1966               | Barumini (Sud Sardegna)                                |
| V7-P14         | 40                    | P(40)                   | 1966               | Oristano                                               |
| V7-P15         | 10                    | S(10)                   | 1975               | Sennori (Sassari)                                      |
| V7-P16         | 7                     | S(7)                    | --                 | Sennori (Sassari)                                      |
| V7-P17         | 37                    | P(34); S(3)             | --                 | Portoscuso (Sud Sardegna)                              |
| V7-P18         | 11                    | A(5); P(4); S(2)        | 1965               | Barumini (Sud Sardegna)                                |
| V7-P19         | 5                     | A(5)                    | --                 | Domusnovas (Sud Sardegna)                              |
| V7-P20         | 27                    | P(13); S(14)            | --                 | Las Plassas (Sud Sardegna)                             |
| V7-P21         | 15                    | P(15)                   | --                 | Carbonia (Sud Sardegna)                                |
| V7-P22         | 5                     | P(1); S(4)              | --                 | Pula (Cagliari)*                                       |
| V7-P23         | 123                   | P(101); R(2); S(20)     | 1965               | Teulada (Sud Sardegna)                                 |
| V7-P24         | 19                    | P(14); R(4); S(1)       | --                 | Teulada (Sud Sardegna)                                 |
| V7-P25         | 73                    | P(60); S(13)            | --                 | Portoscuso (Sud Sardegna)                              |
| V7-P26         | 61                    | A(30); P(25); S(6)      | --                 | Oristano                                               |
| V7-P27         | 38                    | N(1); P(13); S(24)      | --                 | Burcei (Sud Sardegna)                                  |
| V7-P28         | 24                    | P(13); R(2); S(9)       | --                 | Campu Omu (Sinnai, Cagliari)                           |
| V7-P29         | 79                    | A(20); N(2); P(57)      | 1966               | Teulada (Sud Sardegna)                                 |
| V7-P30         | 27                    | P(25); S(2)             | --                 | Las Plassas (Sud Sardegna)                             |
| V7-P31         | 8                     | P(5); S(3)              | 1974               | Carloforte (Sud Sardegna)                              |
| V7-P32         | 25                    | P(24); S(1)             | --                 | Domusnovas (Sud Sardegna)                              |
| V7-P33         | 34                    | P(22); S(12)            | --                 | Bonarcado (Oristano)                                   |
| V7-P34         | 19                    | A(6); P(11); S(2)       | --                 | Oristano                                               |
| V7-P35         | 11                    | S(11)                   | 1974               | Sennori (Sassari)                                      |
| V7-P36         | 73                    | N(4); P(69)             | --                 | Ulassai (Nuoro)                                        |
| V7-P37         | 78                    | A(33); P(36); S(9)      | 1966               | Oristano                                               |
| V7-P38         | 24                    | P(6); S(18)             | --                 | Bonarcado (Oristano)*                                  |
| V7-P39         | 6                     | A(6)                    | --                 | Bonarcado (Oristano)                                   |
| V7-P40         | 20                    | S(20)                   | 1973               | Sennori (Sassari)                                      |
| V7-P41         | 33                    | S(33)                   | 1973               | Sennori (Sassari)                                      |
| V7-P42         | 73                    | P(61); S(12)            | --                 | Spiaggia di Is Mortorius (Quartu Sant'Elena, Cagliari) |
| V7-P43         | 11                    | A(6); P(2); S(3)        | 1966               | Gonnesa (Sud Sardegna)                                 |
| V7-P44         | 14                    | A(8); P(2); S(4)        | 1965               | Villasimius (Sud Sardegna)                             |
| V7-P45         | 26                    | P(12); S(14)            | --                 | Campu Omu (Sinnai, Cagliari)                           |
| V7-P46         | 9                     | S(9)                    | --                 | Sennori (Sassari)                                      |
| V7-P47         | 37                    | P(27); S(10)            | 1964               | Bonarcado (Oristano)                                   |
| V7-P48         | >100                  | Eggs                    | --                 | Pula (Cagliari)                                        |

---

|        |   |            |    |                       |
|--------|---|------------|----|-----------------------|
| V7-P49 | 6 | P(4); R(2) | -- | Burcei (Sud Sardegna) |
|--------|---|------------|----|-----------------------|

---

**Table S8.** Termite specimens from Springhetti Collection. Jar 8: Italian termites, *K. flavicollis* from Sardinia. All abbreviations as in Tables S1 and S2.

| Test tube code | Number of individuals | Castes             | Year of collection | Municipality/Locality               |
|----------------|-----------------------|--------------------|--------------------|-------------------------------------|
| V8-P01         | 8                     | P(3); S(5)         | --                 | Sennori (Sassari)                   |
| V8-P02         | 11                    | P(6); S(5)         | --                 | Sennori (Sassari)                   |
| V8-P03         | 18                    | P(7); S(11)        | --                 | Sennori (Sassari)                   |
| V8-P04         | 11                    | P(4); S(7)         | --                 | Sennori (Sassari)                   |
| V8-P05         | 10                    | S(10)              | 1975               | Sennori (Sassari)                   |
| V8-P06         | 10                    | A(10)              | --                 | Sennori (Sassari)*                  |
| V8-P07         | 9                     | S(9)               | 1975               | Sennori (Sassari)                   |
| V8-P08         | 2                     | S(2)               | --                 | Sennori (Sassari)                   |
| V8-P09         | 14                    | S(14)              | 1976               | Sennori (Sassari)                   |
| V8-P10         | 15                    | P(9); S(6)         | --                 | Sennori (Sassari)                   |
| V8-P11         | 21                    | P(11); S(10)       | --                 | Sennori (Sassari)                   |
| V8-P12         | 15                    | P(6); S(9)         | --                 | Sennori (Sassari)                   |
| V8-P13         | 25                    | P(17); S(8)        | --                 | Sennori (Sassari)                   |
| V8-P14         | 38                    | P(20); S(18)       | 1966               | San Giovanni Suergiu (Sud Sardegna) |
| V8-P15         | 11                    | S(11)              | --                 | San Giovanni Suergiu (Sud Sardegna) |
| V8-P16         | 15                    | S(15)              | --                 | Sennori (Sassari)                   |
| V8-P17         | 14                    | S(14)              | --                 | Sant'Antioco (Sud Sardegna)         |
| V8-P18         | 57                    | A(1); P(29); S(27) | --                 | San Giovanni Suergiu (Sud Sardegna) |
| V8-P19         | 14                    | P(4); S(10)        | --                 | San Giovanni Suergiu (Sud Sardegna) |
| V8-P20         | 48                    | A(2); P(18); S(28) | 1966               | Cagliari*                           |



**Table S9.** Termite specimens from Springhetti Collection. Jar 9: Italian termites, *K. flavicollis* from Sicily. All abbreviations as in Table S1.

| Test tube code | Number of individuals | Castes                   | Year of collection | Municipality/Locality            |
|----------------|-----------------------|--------------------------|--------------------|----------------------------------|
| V9-P01         | 14                    | A(7); P(6); S(1)         | 1975               | Polizzi Generosa (Palermo)       |
| V9-P02         | 6                     | S(6)                     | --                 | Palermo                          |
| V9-P03         | 2                     | P(2)                     | --                 | Bagheria (Palermo)               |
| V9-P04         | 1                     | R(1)                     | --                 | Favara (Agrigento)               |
| V9-P05         | 3                     | P(3)                     | 1963               | Ribera (Agrigento)               |
| V9-P06         | 5                     | A(5)                     | --                 | Palermo?                         |
| V9-P07         | 2                     | A(1); P(1)               | --                 | Rosolini (Siracusa)              |
| V9-P08         | 15                    | P(6); S(9)               | --                 | Polizzi Generosa (Palermo)       |
| V9-P09         | 7                     | P(7)                     | --                 | Siracusa                         |
| V9-P10         | 55                    | A(7); N(3); P(26); S(19) | --                 | Polizzi Generosa (Palermo)       |
| V9-P11         | 14                    | A(2); P(12)              | 1963               | Agrigento                        |
| V9-P12         | 37                    | A(32); P(4); S(1)        | 1967               | Messina                          |
| V9-P13         | 2                     | A(2)                     | 1978               | Castelvetrano (Trapani)          |
| V9-P14         | 14                    | P(7); S(7)               | --                 | Polizzi Generosa (Palermo)       |
| V9-P15         | 33                    | P(22); S(11)             | 1975               | Polizzi Generosa (Palermo)       |
| V9-P16         | 25                    | P(15); S(10)             | --                 | Palermo                          |
| V9-P17         | 5                     | P(4); S(1)               | 1963               | Palma di Montechiaro (Agrigento) |
| V9-P18         | 6                     | A(6)                     | 1975               | Polizzi Generosa (Palermo)       |
| V9-P19         | 17                    | P(11); S(6)              | --                 | Polizzi Generosa (Palermo)       |
| V9-P20         | 14                    | P(9); S(5)               | --                 | Polizzi Generosa (Palermo)       |
| V9-P21         | 18                    | P(12); S(6)              | --                 | Polizzi Generosa (Palermo)       |
| V9-P22         | 23                    | A(11); P(6); S(60)       | --                 | Polizzi Generosa (Palermo)       |
| V9-P23         | 32                    | P(18); S(14)             | 1975               | Polizzi Generosa (Palermo)       |
| V9-P24         | 19                    | P(8); S(11)              | --                 | Polizzi Generosa (Palermo)       |
| V9-P25         | 3                     | P(2); S(1)               | 1975               | Polizzi Generosa (Palermo)       |
| V9-P26         | 25                    | P(17); S(8)              | --                 | Polizzi Generosa (Palermo)       |
| V9-P27         | 1                     | R(1)                     | 1963               | Siculiana (Agrigento)            |
| V9-P28         | 14                    | A(6); P(3); S(5)         | --                 | Polizzi Generosa (Palermo)       |
| V9-P29         | 19                    | A(6); N(2); P(4); S(7)   | 1976               | Polizzi Generosa (Palermo)       |
| V9-P30         | 58                    | A(1); P(48); S(9)        | 1975               | Polizzi Generosa (Palermo)       |
| V9-P31         | 34                    | P(12); S(22)             | --                 | Palermo                          |
| V9-P32         | 33                    | P(11); S(22)             | 1965               | Palermo                          |
| V9-P33         | 30                    | A(9); P(10); S(11)       | --                 | Polizzi Generosa (Palermo)       |
| V9-P34         | 56                    | A(1); P(45); S(10)       | 1975               | Polizzi Generosa (Palermo)       |
| V9-P35         | 21                    | P(17); S(4)              | 1963               | Caduta (Licata, Agrigento)       |
| V9-P36         | 2                     | A(1); P(1)               | 1963               | Monsera (Licata, Agrigento)      |

**Table S10.** Termite specimens from Springhetti Collection. Jar 10: Italian termites, *K. flavicollis* from minor islands of Sicily. All abbreviations as in Table S1.

| Test tube code | Number of individuals | Castes                 | Year of collection | Municipality/Locality |
|----------------|-----------------------|------------------------|--------------------|-----------------------|
| V10-P01        | 76                    | P(31); S(45)           | 1965               | Linosa (Agrigento)    |
| V10-P02        | 331                   | P(172); S(159)         | --                 | Linosa (Agrigento)    |
| V10-P03        | 221                   | A(218); P(3)           | --                 | Linosa (Agrigento)    |
| V10-P04        | 19                    | A(19)                  | --                 | Linosa (Agrigento)    |
| V10-P05        | 32                    | P(13); S(19)           | 1965               | Linosa (Agrigento)    |
| V10-P06        | 34                    | A(19); P(8); S(7)      | 1965               | Linosa (Agrigento)    |
| V10-P07        | 57                    | P(25); S(32)           | 1965               | Linosa (Agrigento)    |
| V10-P08        | 34                    | P(12); S(22)           | 1965               | Linosa (Agrigento)    |
| V10-P09        | 48                    | P(13); S(35)           | 1965               | Linosa (Agrigento)    |
| V10-P10        | 16                    | P(9); R(2); S(5)       | 1965               | Linosa (Agrigento)    |
| V10-P11        | 51                    | A(3); P(36); S(12)     | 1965               | Linosa (Agrigento)    |
| V10-P12        | 14                    | A(1); P(8); S(5)       | --                 | Linosa (Agrigento)    |
| V10-P13        | 18                    | P(10); S(8)            | 1965               | Linosa (Agrigento)    |
| V10-P14        | 69                    | P(51); S(18)           | --                 | Linosa (Agrigento)    |
| V10-P15        | 18                    | A(18)                  | 1965               | Linosa (Agrigento)    |
| V10-P16        | 24                    | P(20); S(4)            | 1965               | Linosa (Agrigento)    |
| V10-P17        | 9                     | A(9)                   | --                 | Linosa (Agrigento)    |
| V10-P18        | 67                    | P(25); S(42)           | 1965               | Linosa (Agrigento)    |
| V10-P19        | 46                    | A(33); S(13)           | 1965               | Lampedusa (Agrigento) |
| V10-P20        | 22                    | A(1); P(11); S(10)     | --                 | Lampedusa (Agrigento) |
| V10-P21        | 9                     | A(3); P(4); S(2)       | --                 | Lampedusa (Agrigento) |
| V10-P22        | 12                    | A(1); P(1); S(10)      | --                 | Lampedusa (Agrigento) |
| V10-P23        | 23                    | S(23)                  | 1965               | Lampedusa (Agrigento) |
| V10-P24        | 24                    | P(17); S(7)            | --                 | Lampedusa (Agrigento) |
| V10-P25        | 22                    | P(12); S(10)           | --                 | Lampedusa (Agrigento) |
| V10-P26        | 18                    | A(7); P(4); S(7)       | 1965               | Lampedusa (Agrigento) |
| V10-P27        | 18                    | A(4); N(2); P(8); S(4) | 1965               | Pantelleria (Trapani) |
| V10-P28        | 19                    | P(10); S(9)            | --                 | Pantelleria (Trapani) |

**Table S11.** Termite specimens from Springhetti Collection. Jar 11: Italian termites, *K. flavicollis* from Apulia. All abbreviations as in Table S1.

| Test tube code | Number of individuals | Castes             | Year of collection | Municipality/Locality                         |
|----------------|-----------------------|--------------------|--------------------|-----------------------------------------------|
| V11-P01        | 3                     | P(2); S(1)         | 1973               | Mattinata (Foggia)                            |
| V11-P02        | 1                     | P(1)               | 1973               | Manfredonia (Foggia)                          |
| V11-P03        | 9                     | P(8); A(1)         | 1973               | Mattinata (Foggia)                            |
| V11-P04        | 13                    | A(1); P(10); S(2)  | 1973               | Vico del Gargano (Foggia)                     |
| V11-P05        | 7                     | P(7)               | 1975               | Galatone (Lecce)                              |
| V11-P06        | 22                    | A(7); P(7); S(8)   | --                 | Squinzano (Lecce)                             |
| V11-P07        | 10                    | P(10)              | 1971               | Squinzano (Lecce)                             |
| V11-P08        | 1                     | A(1)               | 1975               | Leuca (Lecce)                                 |
| V11-P09        | 3                     | P(2); S(1)         | 1973               | Posta Padovano (San Giovanni Rotondo, Foggia) |
| V11-P10        | 11                    | P(10); S(1)        | 1973               | Mattinata (Foggia)                            |
| V11-P11        | 13                    | S(13)              | 1971               | Squinzano (Lecce)                             |
| V11-P12        | 15                    | A(8); S(7)         | --                 | Squinzano (Lecce)                             |
| V11-P13        | 30                    | P(25); S(5)        | 1975               | Andrano (Lecce)                               |
| V11-P14        | 12                    | P(6); S(6)         | --                 | Squinzano (Lecce)                             |
| V11-P15        | 9                     | P(9)               | 1973               | Manfredonia (Foggia)                          |
| V11-P16        | 9                     | S(9)               | 1954               | Gallipoli (Lecce)                             |
| V11-P17        | 2                     | A(1); P(1)         | 1973               | Manfredonia (Foggia)                          |
| V11-P18        | 26                    | P(26)              | 1973               | Manfredonia (Foggia)                          |
| V11-P19        | 5                     | P(5)               | 1973               | Manfredonia (Foggia)                          |
| V11-P20        | 8                     | P(7); S(1)         | 1973               | Posta Padovano (San Giovanni Rotondo, Foggia) |
| V11-P21        | 6                     | P(5); S(1)         | 1973               | Manfredonia (Foggia)                          |
| V11-P22        | 10                    | P(8); S(2)         | 1973               | Manfredonia (Foggia)                          |
| V11-P23        | 3                     | P(3)               | 1973               | Monte Sant' Angelo (Foggia)                   |
| V11-P24        | 18                    | A(18)              | 1976               | Squinzano (Lecce)                             |
| V11-P25        | 7                     | S(7)               | --                 | Squinzano (Lecce)                             |
| V11-P26        | 1                     | S(1)               | 1968               | Manduria (Taranto)                            |
| V11-P27        | 10                    | P(9); S(1)         | 1973               | Mattinata (Foggia)                            |
| V11-P28        | 4                     | P(3); S(1)         | 1973               | Manfredonia (Foggia)                          |
| V11-P29        | 5                     | P(5)               | 1968               | Manduria (Taranto)                            |
| V11-P30        | 11                    | P(10); S(1)        | 1973               | San Giovanni Rotondo (Foggia)                 |
| V11-P31        | 3                     | P(3)               | 1973               | Manfredonia (Foggia)                          |
| V11-P32        | 21                    | P(20); S(1)        | 1973               | Manfredonia (Foggia)                          |
| V11-P33        | 2                     | A(1); P(1)         | 1973               | Manfredonia (Foggia)                          |
| V11-P34        | 5                     | P(5)               | 1973               | San Giovanni Rotondo (Foggia)                 |
| V11-P35        | 3                     | P(3)               | 1973               | Mattinata (Foggia)                            |
| V11-P36        | 6                     | P(6)               | 1973               | Manfredonia (Foggia)                          |
| V11-P37        | 11                    | P(10); S(1)        | 1973               | Manfredonia (Foggia)                          |
| V11-P38        | 29                    | A(6); P(6); S(17)  | 1975               | Squinzano (Lecce)                             |
| V11-P39        | 9                     | P(9)               | 1973               | Mattinata (Foggia)                            |
| V11-P40        | 13                    | P(13)              | 1973               | Mattinata (Foggia)                            |
| V11-P41        | 18                    | P(16); S(2)        | 1973               | Mattinata (Foggia)                            |
| V11-P42        | 28                    | A(10); P(8); S(10) | --                 | Squinzano (Lecce)                             |
| V11-P43        | 38                    | P(37); S(1)        | 1973               | Mattinata (Foggia)                            |
| V11-P44        | 6                     | P(6)               | 1973               | San Giovanni Rotondo (Foggia)                 |
| V11-P45        | 2                     | P(2)               | 1973               | Manfredonia (Foggia)                          |
| V11-P46        | 1                     | S(1)               | 1973               | Manfredonia (Foggia)                          |
| V11-P47        | 24                    | A(23); P(1)        | 1953               | Gallipoli (Lecce)                             |

|         |     |                          |      |                    |
|---------|-----|--------------------------|------|--------------------|
| V11-P48 | 36  | P(34); S(2)              | 1973 | Mattinata (Foggia) |
| V11-P49 | 27  | P(26); S(1)              | 1973 | Mattinata (Foggia) |
| V11-P50 | 319 | A(9); N(1); P(304); S(5) | 1953 | Gallipoli (Lecce)  |
| V11-P51 | 96  | P(90); S(6)              | 1975 | Squinzano (Lecce)  |

**Table S12.** Termite specimens from Springhetti Collection. Jar 12: Italian termites, *K. flavicollis*. All abbreviations as in Table S1.

| Test tube code | Number of individuals | Castes                    | Year of collection | Administrative Region | Municipality/Locality                         |
|----------------|-----------------------|---------------------------|--------------------|-----------------------|-----------------------------------------------|
| V12-P01        | 5                     | P(5)                      | --                 | Calabria              | Belvedere di Spinello (Crotone)               |
| V12-P02        | 33                    | P(20); S(13)              | 1976               | Calabria              | Spilinga (Vibo Valentia)                      |
| V12-P03        | 108                   | A(56); N(14); P(32); S(6) | 1974               | Calabria              | Paola (Cosenza)                               |
| V12-P04        | 2                     | A(1); P(1)                | --                 | Calabria              | Pellegrina (Bagnara Calabra, Reggio Calabria) |
| V12-P05        | 5                     | P(1); S(4)                | --                 | Calabria              | Belvedere di Spinello (Crotone)               |
| V12-P06        | 42                    | A(1); P(28); S(13)        | 1964               | Basilicata            | Maratea (Potenza)                             |
| V12-P07        | 7                     | P(6); S(1)                | 1980               | Basilicata            | Oliveto Lucano (Matera)                       |
| V12-P08        | 9                     | A(2); P(4); S(3)          | 1964               | Basilicata            | Montalbano Jonico (Matera)                    |
| V12-P09        | 11                    | P(11)                     | 1964               | Basilicata            | Bernalda (Matera)                             |
| V12-P10        | 5                     | S(5)                      | --                 | Basilicata            | Montalbano Jonico (Matera)                    |

**Table S13.** Termite specimens from Springhetti Collection. Jar 13: Italian termites, *K. flavicollis* from Campania. All abbreviations as in Tables S1 and S2.

| Test tube code | Number of individuals | Castes                   | Year of collection | Municipality/Locality             |
|----------------|-----------------------|--------------------------|--------------------|-----------------------------------|
| V13-P01        | 7                     | P(6); S(1)               | 1964               | Telese Terme (Benevento)          |
| V13-P02        | 6                     | P(3); S(3)               | 1981               | Ischia (Napoli)                   |
| V13-P03        | 8                     | A(2); P(6)               | 1964               | Fisciano (Salerno)                |
| V13-P04        | 1                     | R(1)                     | 1980               | Barano d'ischia (Napoli)          |
| V13-P05        | 11                    | A(11)                    | 1964               | Capua (Caserta)                   |
| V13-P06        | 1                     | R(1)                     | 1981               | Ischia (Napoli)                   |
| V13-P07        | 6                     | P(3); S(3)               | 1981               | Forio (Napoli)                    |
| V13-P08        | 4                     | A(2); P(1); S(1)         | 1961               | Ischia (Napoli)                   |
| V13-P09        | 19                    | A(19)                    | --                 | Portici (Napoli)                  |
| V13-P10        | 6                     | P(2); S(4)               | --                 | Lapio (Avellino)                  |
| V13-P11        | 11                    | P(9); S(2)               | 1964               | Maddaloni (Caserta)               |
| V13-P12        | 19                    | A(14); P(5)              | 1980               | Ischia (Napoli)                   |
| V13-P13        | 77                    | A(47); N(2); P(21); S(7) | 1964               | Maddaloni (Caserta)               |
| V13-P14        | 20                    | A(1); P(16); S(3)        | 1965               | Lapio (Avellino)                  |
| V13-P15        | 13                    | S(13)                    | 1967               | Portici (Napoli)                  |
| V13-P16        | 21                    | P(20); S(1)              | 1964               | Pertosa (Salerno)                 |
| V13-P17        | 13                    | A(6); P(5); S(2)         | 1962               | Isola di Vivara (Procida, Napoli) |
| V13-P18        | 10                    | A(10)                    | --                 | Portici? (Napoli)                 |
| V13-P19        | 21                    | A(1); P(18); S(2)        | 1964               | Sarno (Salerno)                   |
| V13-P20        | 48                    | A(1); P(43); S(4)        | 1965               | Portici (Napoli)                  |
| V13-P21        | 8                     | A(1); P(3); S(4)         | --                 | Portici (Napoli)                  |
| V13-P22        | 26                    | P(12); S(14)             | --                 | Portici (Napoli)*                 |

**Table S14.** Termite specimens from Springhetti Collection. Jar 14: Italian termites, *K. flavicollis*. All abbreviations as in Table S1 and S2.

| Test tube code | Number of individuals | Castes                 | Year of collection | Administrative Region | Municipality/Locality           |
|----------------|-----------------------|------------------------|--------------------|-----------------------|---------------------------------|
| V14-P01        | 7                     | S(7)                   | 1966               | Tuscany               | Viareggio (Lucca)               |
| V14-P02        | 14                    | P(13); S(1)            | --                 | Tuscany               | Viareggio (Lucca)*              |
| V14-P03        | 57                    | P(21); R(2); S(34)     | 1966               | Tuscany               | Viareggio (Lucca)               |
| V14-P04        | 14                    | P(9); S(5)             | 1966               | Tuscany               | Massarosa (Lucca)               |
| V14-P05        | 18                    | A(1); N(1); P(8); S(8) | 1966               | Tuscany               | Viareggio (Lucca)               |
| V14-P06        | 1                     | R(1)                   | 1966               | Tuscany               | Pisa                            |
| V14-P07        | 13                    | A(13)                  | --                 | Tuscany               | Viareggio (Lucca)               |
| V14-P08        | 14                    | A(14)                  | --                 | Tuscany               | Viareggio (Lucca)               |
| V14-P09        | 12                    | P(10); S(2)            | 1976               | Tuscany               | Carrara (Massa-Carrara)         |
| V14-P10        | 9                     | A(3); P(3); S(3)       | 1991               | Tuscany               | Marina di Alberese (Grosseto)   |
| V14-P11        | 27                    | A(1); P(13); S(13)     | --                 | Tuscany               | Poggibonsi (Siena)              |
| V14-P12        | 45                    | P(45)                  | 1978               | Tuscany               | Volterra (Pisa)                 |
| V14-P13        | 1                     | S(1)                   | 1958               | Marche                | Mondolfo (Pesaro e Urbino)      |
| V14-P14        | 68                    | A(2); P(63); S(3)      | --                 | Abruzzo               | Orsogna (Chieti)                |
| V14-P15        | 10                    | A(10)                  | --                 | Marche                | Ancona                          |
| V14-P16        | 21                    | P(19); S(2)            | --                 | Abruzzo               | Francavilla al Mare (Chieti)    |
| V14-P17        | 13                    | A(3); P(7); S(3)       | --                 | Abruzzo               | Pescara                         |
| V14-P18        | 10                    | A(10)                  | --                 | Marche                | Ancona                          |
| V14-P19        | 25                    | A(3); P(15); S(7)      | --                 | Abruzzo               | Pescara                         |
| V14-P20        | 29                    | P(11); S(18)           | --                 | Abruzzo               | Miglianico (Chieti)             |
| V14-P21        | 6                     | A(2); P(3); S(1)       | 1970               | Abruzzo               | Poggiofiorito (Chieti)          |
| V14-P22        | 10                    | P(8); S(2)             | 1973               | Abruzzo               | Bucchianico (Chieti)            |
| V14-P23        | 24                    | A(16); P(8)            | --                 | Umbria                | Amelia (Terni)                  |
| V14-P24        | 17                    | P(4); S(13)            | --                 | Emilia Romagna        | Migliarino (Fiscaglia, Ferrara) |
| V14-P25        | 18                    | P(16); S(2)            | 1958               | Marche                | Grottammare (Ascoli Piceno)     |
| V14-P26        | 49                    | P(28); S(21)           | 1966               | Marche                | Ancona                          |
| V14-P27        | 436                   | A(436)                 | --                 | Marche                | Ancona                          |
| V14-P28        | 34                    | P(32); S(2)            | --                 | Marche                | Senigallia                      |
| V14-P29        | 52                    | P(47); S(5)            | 1973               | Abruzzo               | Chieti                          |
| V14-P30        | 47                    | A(4); P(26); S(17)     | 1966               | Marche                | Ancona                          |
| V14-P31        | 44                    | P(26); S(18)           | 1966               | Marche                | Ancona                          |
| V14-P32        | 12                    | A(6); P(2); S(4)       | 1958               | Marche                | Ancona                          |
| V14-P33        | 32                    | A(32)                  | --                 | Marche                | Ancona                          |
| V14-P34        | 18                    | A(18)                  | --                 | Marche                | Ancona                          |
| V14-P35        | 22                    | P(12); S(10)           | --                 | Marche                | Ancona                          |
| V14-P36        | 31                    | P(21); S(10)           | 1966               | Marche                | Ancona                          |
| V14-P37        | 45                    | P(34); S(11)           | --                 | Abruzzo               | Miglianico (Chieti)             |
| V14-P38        | 16                    | P(1); S(15)            | 1966               | Abruzzo               | Pescara                         |
| V14-P39        | 22                    | A(22)                  | --                 | Marche                | Ancona                          |
| V14-P40        | 14                    | A(14)                  | --                 | Abruzzo               | Montesilvano (Pescara)*         |
| V14-P41        | 62                    | P(38); S(24)           | 1966               | Marche                | Ancona                          |
| V14-P42        | 41                    | A(2); P(35); S(4)      | 1973               | Abruzzo               | Chieti                          |
| V14-P43        | 35                    | P(20); S(15)           | --                 | Marche                | Ancona                          |

**Table S15.** Termite specimens from Springhetti Collection. Jar 17, foreign termites: *Mastotermes darwiniensis*, Australia. All abbreviations as in Table S1.

| Test tube code | Number of individuals | Castes            | Year of collection | State                           | Locality    |
|----------------|-----------------------|-------------------|--------------------|---------------------------------|-------------|
| V17-P01        | 97                    | A(6); S(1); W(90) | 1913               | Northern Territory of Australia | Koolpinyah  |
| V17-P02        | 4                     | A(1); S(2); W(1)  | --                 | Queensland                      | --          |
| V17-P03        | 13                    | A(13)             | 1953               | --                              | --          |
| V17-P04        | 5                     | W(5)              | --                 | --                              | --          |
| V17-P05        | 802                   | S(11); W(791)     | 1959               | Queensland                      | Rita Island |

**Table S16.** Termite specimens from Springhetti Collection. Jar 18, foreign termites: Hodotermitidae from Africa (except V18-P03 from United States). All abbreviations as in Table S1.

| Test tube code | Number of individuals | Castes             | Year of collection | State            | Locality                             |
|----------------|-----------------------|--------------------|--------------------|------------------|--------------------------------------|
| V18-P01        | 25                    | W(25)              | 1959               | Egypt            | Cairo Governorate                    |
| V18-P02        | 34                    | A(24); W(10)       | 1960               | Egypt            | --                                   |
| V18-P03        | 50                    | N(17); S(1); W(32) | 1981               | California (USA) | --                                   |
| V18-P04        | 8                     | S(4); W(4)         | --                 | ---              | --                                   |
| V18-P05        | 91                    | W(91)              | 1960               | Egypt            | Ismailia Governorate                 |
| V18-P06        | 74                    | W(74)              | 1959               | Egypt            | --                                   |
| V18-P07        | 162                   | A(34); W(128)      | 1958               | Egypt            | Abu Rawash (Cairo Governorate)       |
| V18-P08        | 116                   | S(5); W(111)       | 1960               | Egypt            | --                                   |
| V18-P09        | 310                   | W(310)             | 1958               | Egypt            | Damanhur (Beheira Governorate)       |
| V18-P10        | 216                   | W(216)             | 1959               | Egypt            | Hawsh 'Isa (Beheira Governorate)     |
| V18-P11        | 129                   | A(40); S(1); W(88) | 1960               | Egypt            | Tell El Kebir (Ismailia Governorate) |
| V18-P12        | 105                   | W(105)             | 1959               | Egypt            | Cairo Governorate                    |
| V18-P13        | 71                    | A(3); S(3); W(65)  | 1960               | Egypt            | Abu Hammad (Sharqia Governorate)     |
| V18-P14        | 59                    | A(6); W(53)        | 1960               | Egypt            | Abu Hammad (Sharqia Governorate)     |

**Table S17.** Termite specimens from Springhetti Collection. Jar 19, foreign termites: unidentified from Africa and Pakistan. All abbreviations as in Table S1.

| Test tube code | Number of individuals | Castes           | Year of collection | State                    | Locality                |
|----------------|-----------------------|------------------|--------------------|--------------------------|-------------------------|
| V19-P01        | 1                     | R(1)             | 1952               | Uganda                   | --                      |
| V19-P02        | 1                     | R(1)             | 1953               | Central African Republic | --                      |
| V19-P03        | 2                     | 2(2)             | 1952               | Uganda                   | Agoro (Northern Region) |
| V19-P04        | 3                     | R(1); W(2)       | 1952               | Uganda                   | Agoro (Northern Region) |
| V19-P05        | 1                     | R(1)             | --                 | --                       | --                      |
| V19-P06        | 5                     | R(1); S(4)       | 1952               | Uganda                   | Agoro (Northern Region) |
| V19-P07        | 1                     | R(1)             | 1953               | Central African Republic | --                      |
| V19-P08        | 8                     | R(1); S(4); W(3) | 1952               | Uganda                   | Agoro (Northern Region) |
| V19-P09        | 7                     | R(3); W(4)       | 1952               | Uganda                   | --                      |
| V19-P10        | 1                     | R(1)             | 1952               | Uganda                   | --                      |
| V19-P11        | 70                    | A(70)            | 1953               | Pakistan                 | --                      |

**Table S18.** Termite specimens from Springhetti Collection. Jar 20, foreign and Italian termites belonging to 5 families from all continents. SE, secondary reproducers. All other abbreviations as in Table 1.

| Test tube code | Taxon                             | Number of individuals | Castes             | Year of collection | State                        | Locality                            |
|----------------|-----------------------------------|-----------------------|--------------------|--------------------|------------------------------|-------------------------------------|
| V20-P01        | <i>Zootermopsis angusticollis</i> | 1                     | SE(1)              | 1934               | California                   | Berkeley                            |
| V20-P02        | <i>Zootermopsis angusticollis</i> | 57                    | P(56); SE(1)       | --                 | California                   | --                                  |
| V20-P03        | <i>Reticulitermes lucifugus</i>   | 5                     | A(5)               | 1952               | Italy                        | Genova                              |
| V20-P04        | <i>Zootermopsis angusticollis</i> | 30                    | A(29); P(1)        | --                 | California                   | --                                  |
| V20-P05        | <i>Procryptotermes</i> sp.        | 5                     | S(1); W(4)         | --                 | --                           | --                                  |
| V20-P06        | <i>Archotermopsis wroughtoni</i>  | 2                     | S(1); W(1)         | 1915               | India                        | --                                  |
| V20-P07        | <i>Kaloterme minor</i>            | 3                     | A(3)               | --                 | Arizona                      | Sabino Canyon                       |
| V20-P08        | <i>Psammotermes assuanensis</i>   | 36                    | A(12); S(15); W(9) | 1959               | Egypt                        | Ain Shams (Cairo Governorate)       |
| V20-P09        | <i>Nasutitermes</i> sp.           | 18                    | A(4); S(8); W(6)   | 1971               | --                           | --                                  |
| V20-P10        | Unidentified                      | 29                    | A(3); S(13); W(13) | --                 | Pakistan                     | --                                  |
| V20-P11        | <i>Stoloterme africanus</i>       | 3                     | S(2); W(1)         | 1935               | South Africa                 | Coldstream (Eastern Cape)           |
| V20-P12        | Unidentified                      | 57                    | S(2); W(55)        | 1968               | Venezuela                    | --                                  |
| V20-P13        | <i>Zootermopsis angusticollis</i> | 26                    | N(1); P(25)        | --                 | California                   | --                                  |
| V20-P14        | <i>Zootermopsis angusticollis</i> | 2                     | S(2)               | 1934               | California                   | Berkeley                            |
| V20-P15        | Unidentified                      | 17                    | S(17)              | 1960               | Brazil                       | --                                  |
| V20-P16        | <i>Zootermopsis angusticollis</i> | 43                    | N(8); P(35)        | --                 | California                   | --                                  |
| V20-P17        | Unidentified                      | 5                     | S(5)               | --                 | Benin                        | Abomey (Zou Department)             |
| V20-P18        | Unidentified                      | 13                    | S(1); W(12)        | --                 | Benin                        | Abomey (Zou Department)             |
| V20-P19        | <i>Procryptotermes</i> sp.        | 22                    | S(4); W(18)        | --                 | --                           | --                                  |
| V20-P20        | <i>Cubitermes gibbifrons</i>      | 34                    | S(6); W(28)        | 1957               | Democratic Republic of Congo | Yangambi (Oriental Province)        |
| V20-P21        | <i>Zootermopsis angusticollis</i> | 4                     | A(3); W(1)         | --                 | California                   | --                                  |
| V20-P22        | <i>Kaloterme</i> sp.              | 3                     | A(2); W(1)         | --                 | Texas                        | Brownsville                         |
| V20-P23        | <i>Reticulitermes flavipes</i>    | 65                    | A(65)              | --                 | --                           | --                                  |
| V20-P24        | <i>Reticulitermes flavipes</i>    | 55                    | N(11); W(29) S(15) | --                 | Germany                      | Leverkusen (North Rhine-Westphalia) |
| V20-P25        | <i>Archotermopsis wroughtoni</i>  | 8                     | S(2); W(6)         | 1962               | India                        | Achabal (Kashmir Division)          |
| V20-P26        | <i>Kaloterme shvarzi</i>          | 5                     | A(5)               | --                 | Florida                      | Paradise Key                        |
| V20-P27        | <i>Kaloterme hubbardi</i>         | 4                     | A(4)               | --                 | Arizona                      | Sabino canyon                       |
| V20-P28        | <i>Reticulitermes lucifugus?</i>  | 2                     | R(2)               | --                 | --                           | --                                  |
| V20-P29        | <i>Stoloterme brunneicornis</i>   | 6                     | A(6)               | 1878               | New Zealand                  | Titirangi (Auckland)                |
| V20-P30        | <i>Poroterme planiceps</i>        | 9                     | S(8); W(1)         | 1938               | South Africa                 | Wilderness (Western Cape)           |
| V20-P31        | <i>Reticulitermes hesperus</i>    | 11                    | A(8); W(3)         | 1951               | California                   | Sacramento                          |
| V20-P32        | <i>Psammotermes assuanensis</i>   | 54                    | A(19); S(35)       | 1959               | Egypt                        | --                                  |
| V20-P33        | <i>Reticulitermes virginicus</i>  | 6                     | A(6)               | --                 | Virginia                     | Roanoke                             |
| V20-P34        | <i>Zootermopsis angusticollis</i> | 5                     | A(5)               | --                 | State of Washington          | Olympia                             |
| V20-P35        | <i>Schedorhinoterme javanicus</i> | 26                    | S(12); W(14)       | --                 | Indonesia                    | Fort de Kock (West Sumatra)         |
| V20-P36        | <i>Kaloterme flavicollis</i>      | 11                    | A(11)              | --                 | Italy                        | Apulia (Region)                     |
| V20-P37        | <i>Poroterme planiceps</i>        | 15                    | A(14); W(1)        | 1935               | South Africa                 | Wilderness (Western Cape)           |
| V20-P38        | <i>Reticulitermes virginicus</i>  | 77                    | A(77)              | 1949               | South Carolina               | Spartanburg                         |



|         |                                    |    |                   |      |                              |                 |
|---------|------------------------------------|----|-------------------|------|------------------------------|-----------------|
| V20-P39 | <i>Coptotermes sjostedti</i>       | 4  | A(4)              | 1948 | Democratic Republic of Congo | --              |
| V20-P40 | <i>Psammotermes fuscofemorals?</i> | 97 | S(11); W(86)      | 1958 | Egypt                        | --              |
| V20-P41 | <i>Neotermes</i> sp.               | 23 | A(2); S(1); W(20) | --   | --                           | Rio Tanaro (?)  |
| V20-P42 | <i>Coptotermes lacteus</i>         | 72 | S(33); W(39)      | --   | --                           | --              |
| V20-P43 | <i>Reticulitermes tibialis?</i>    | 32 | A(27); S(1); W(4) | --   | --                           | --              |
| V20-P44 | <i>Kalotermes flavicollis</i>      | 62 | S(62)             | 1954 | Italy                        | Apulia (Region) |
| V20-P45 | <i>Coptotermes lacteus</i>         | 39 | S(11); W(28)      | --   | --                           | --              |

**Table S19.** Termite specimens from Springhetti Collection. Jar 21, foreign termites from Africa, Asia, America and Oceania. The

| Test tube code | Taxon                            | Number of individuals | Castes                    | Year of collection | State                    | Locality                |
|----------------|----------------------------------|-----------------------|---------------------------|--------------------|--------------------------|-------------------------|
| V21-P01        | Unidentified                     | 1                     | R(1)                      | 1953               | Senegal                  | --                      |
| V21-P02        | <i>Bellicositermes jeanneli?</i> | 15                    | S(15)                     | 1952               | Uganda                   | --                      |
| V21-P03        | Unidentified                     | 1                     | R(1)                      | 1953               | Filippine                | Manila                  |
| V21-P04        | Unidentified                     | 1                     | R(1)                      | 1960               | Somalia?                 | --                      |
| V21-P05        | Unidentified                     | 11                    | A(11)                     | 1952               | Uganda                   | --                      |
| V21-P06        | Unidentified                     | 74                    | S(56); W(18)              | 1953               | Central African Republic | --                      |
| V21-P07        | Unidentified                     | 185                   | R(1); S(31); W(153)       | 1953               | Senegal                  | --                      |
| V21-P08        | Unidentified                     | 239                   | A(3); S(64); W(172)       | 1953               | Central African Republic | --                      |
| V21-P09        | Unidentified                     | 554                   | S(36); W(510); A(7); R(1) | 1953               | Central African Republic | --                      |
| V21-P10        | Unidentified                     | 132                   | R(1); S(108); W(23)       | 1952               | Uganda                   | Agoro (Northern Region) |
| V21-P11        | Unidentified                     | 456                   | S(86); W(370)             | 1953               | Filippine                | Manila                  |
| V21-P12        | <i>Psammotermes assuanensis</i>  | 307                   | W(307)                    | 1959               | Egypt                    | --                      |
| V21-P13        | Unidentified                     | 369                   | S(11); W(358)             | 1956               | New Guinea island        | --                      |
| V21-P14        | Unidentified                     | 1135                  | W(822); S(313)            | 1964               | Panama                   | El Chorrillo            |
| V21-P15        | Unidentified                     | 533                   | W(363); S(170)            | 1953               | Pakistan                 | --                      |

species are mostly unidentified. All abbreviations as in Table S1.

**Table S20.** Termite specimens from Springhetti Collection. Jar 22, foreign termites from Africa, Asia and America. The species are mostly unidentified. All abbreviations as in Table S1.

| Test tube code | Taxon                              | Number of individuals | Castes               | Year of collection | State        | Locality                    |
|----------------|------------------------------------|-----------------------|----------------------|--------------------|--------------|-----------------------------|
| V22-P01        | <i>Odontotermes badius</i>         | 23                    | A(23)                | 1952               | Kenya        | Muguga (Kiambu County)      |
| V22-P02        | Unidentified                       | 48                    | S(31); W(17)         | 1960               | Brazil       | --                          |
| V22-P03        | Unidentified                       | 35                    | N(2); R(1); W(32)    | 1960               | Brazil       | --                          |
| V22-P04        | Unidentified                       | 18                    | S(3); W(15)          | 1960               | Brazil       | --                          |
| V22-P05        | Unidentified                       | 10                    | S(10)                | 1960               | Brazil       | --                          |
| V22-P06        | Unidentified                       | 1                     | R(1)                 | 1953               | Senegal      | --                          |
| V22-P07        | <i>Reticulitermes lucifugus?</i>   | 15                    | A(15)                | --                 | --           | --                          |
| V22-P08        | Unidentified                       | 11                    | N(10); R(1)          | 1952               | Sierra Leone | --                          |
| V22-P09        | Unidentified                       | 164                   | A(56); S(104); W(4)  | 1960               | Egypt        | --                          |
| V22-P10        | Unidentified                       | 56                    | S(37); W(19)         | 1960               | Brazil       | --                          |
| V22-P11        | Unidentified                       | 83                    | R(2); S(52); W(29)   | 1960               | Somalia?     | --                          |
| V22-P12        | Unidentified                       | 78                    | A(2); W(76)          | 1960               | Egypt        | --                          |
| V22-P13        | Unidentified                       | 664                   | S(584); W(80)        | 1960               | Senegal      | Bambey (Diourbel Region)    |
| V22-P14        | <i>Schedorhinotermes javanicus</i> | 22                    | A(22)                | 1934               | Sumatra      | Fort de Kock (West Sumatra) |
| V22-P15        | Unidentified                       | 425                   | A(1); S(154); W(270) | 1960               | Senegal      | Bambey (Diourbel Region)    |
| V22-P16        | <i>Eutermes</i> sp.                | 1158                  | S(336); W(822)       | 1924               | Sumatra      | --                          |
| V22-P17        | Unidentified                       | 431                   | S(390); W(41)        | 1960               | Senegal      | Bambey (Diourbel Region)    |
| V22-P18        | Unidentified                       | 604                   | S(526); W(78)        | 1954               | Filippine    | Manila                      |

**Table S21.** Termite specimens from Springhetti Collection. Jar 23, foreign termites from Africa, Asia and America. The species are mostly unidentified. All abbreviations as in Table S1.

| Test tube code | Taxon                              | Number of individuals | Castes                    | Year of collection | State                    | Locality                     |
|----------------|------------------------------------|-----------------------|---------------------------|--------------------|--------------------------|------------------------------|
| V23-P01        | Unidentified                       | 1                     | R(1)                      | 1953               | Central African Republic | --                           |
| V23-P02        | <i>Pseudacanthotermes minor?</i>   | 26                    | A(3); S(5); W(18)         | --                 | Uganda                   | --                           |
| V23-P03        | Unidentified                       | 34                    | A(9); N(6); S(7); W(12)   | 1955               | Japan                    | --                           |
| V23-P04        | Unidentified                       | 198                   | N(4); W(182); S(12)       | 1955               | Japan                    | --                           |
| V23-P05        | Unidentified                       | 69                    | A(26); R(2); S(30); W(11) | 1953               | Kenya                    | --                           |
| V23-P06        | Unidentified                       | 52                    | S(32); W(20)              | 1954               | Mozambico                | Zambezia Province            |
| V23-P07        | Unidentified                       | 41                    | A(13); S(28)              | 1954               | Central African Republic | --                           |
| V23-P08        | Unidentified                       | 88                    | S(38); W(50)              | 1952               | Central African Republic | --                           |
| V23-P09        | Unidentified                       | 49                    | A(48); S(1)               | 1953               | Central African Republic | --                           |
| V23-P10        | Unidentified                       | 81                    | R(1); S(22); W(58)        | 1952               | Uganda                   | --                           |
| V23-P11        | Unidentified                       | 569                   | S(57); W(512)             | 1955               | Argentina                | Formosa (Formosa Department) |
| V23-P12        | Unidentified                       | 53                    | S(39); W(14)              | 1952               | Uganda                   | --                           |
| V23-P13        | Unidentified                       | 1                     | S(1)                      | 1952               | Sierra Leone             | --                           |
| V23-P14        | Unidentified                       | 84                    | S(24); W(60)              | 1952               | Tanzania                 | --                           |
| V23-P15        | Unidentified                       | 74                    | A(33); S(41)              | 1953               | Central African Republic | --                           |
| V23-P16        | Unidentified                       | 467                   | N(1); R(2); S(38); W(426) | 1953               | Kenya                    | --                           |
| V23-P17        | <i>Schedorhinotermes javanicus</i> | 8                     | A(8)                      | 1922               | Sumatra                  | Fort de Kock (West Sumatra)  |
| V23-P18        | Unidentified                       | 7                     | N(2); S(2); W(3)          | 1955               | Japan                    | Tokyo                        |
| V23-P19        | Unidentified                       | 57                    | S(55); W(2)               | 1954               | Mozambico                | Zambezia Province            |
| V23-P20        | Unidentified                       | 546                   | N(7); W(539)              | 1952               | Sierra Leone             | --                           |
| V23-P21        | Unidentified                       | 95                    | S(52); W(43)              | 1953               | Kenya                    | --                           |
| V23-P22        | <i>Schedorhinotermes sp.</i>       | 76                    | S(54); W(22)              | --                 | --                       | --                           |
| V23-P23        | Unidentified                       | 113                   | S(2); W(111)              | 1953               | Kenya                    | --                           |
| V23-P24        | Unidentified                       | 96                    | S(1); W(95)               | 1952               | Uganda                   | --                           |
| V23-P25        | Unidentified                       | 133                   | W(133)                    | 1954               | Mozambico                | Zambezia Province            |
| V23-P26        | Unidentified                       | 724                   | N(2); S(55); W(667)       | 1955               | Argentina                | Formosa (Formosa Department) |
| V23-P27        | Unidentified                       | 444                   | S(27); W(417)             | 1952               | Sierra Leone             | --                           |

**Table S22.** Termite specimens from Springhetti Collection. Jar 24, foreign termites from Africa, Asia and Oceania. The species are mostly unidentified. All abbreviations as in Table S1.

| Test tube code | Taxon                               | Number of individuals | Castes                | Year of collection | State                    | Locality                    |
|----------------|-------------------------------------|-----------------------|-----------------------|--------------------|--------------------------|-----------------------------|
| V24-P01        | Unidentified                        | 1                     | R(1)                  | 1964               | Somalia?                 | --                          |
| V24-P02        | Unidentified                        | 198                   | S(110); W(88)         | 1964               | Somalia?                 | --                          |
| V24-P03        | Unidentified                        | 10                    | A(10)                 | 1964               | Somalia?                 | --                          |
| V24-P04        | Unidentified                        | 88                    | A(2); S(19); W(67)    | 1952               | Uganda                   | --                          |
| V24-P05        | Unidentified                        | 35                    | S(35)                 | 1952               | Uganda                   | --                          |
| V24-P06        | Unidentified                        | 66                    | S(56); W(10)          | 1952               | Sierra Leone             | --                          |
| V24-P07        | Unidentified                        | 50                    | S(50)                 | 1952               | Sierra Leone             | --                          |
| V24-P08        | Unidentified                        | 18                    | W(18)                 | 1953               | Filippine                | Manila                      |
| V24-P09        | Unidentified                        | 9                     | S(9)                  | 1952               | Central African Republic | --                          |
| V24-P10        | Unidentified                        | 227                   | N(5); S(18); W(204)   | 1956               | New Guinea island        | --                          |
| V24-P11        | Unidentified                        | 750                   | A(227); S(29); W(494) | 1952               | Sierra Leone             | --                          |
| V24-P12        | Unidentified                        | 228                   | W(228)                | 1960               | Somalia?                 | --                          |
| V24-P13        | Unidentified                        | 326                   | S(35); W(291)         | 1952               | Central African Republic | --                          |
| V24-P14        | <i>Psammotermes fuscofemorialis</i> | 844                   | W(844)                | 1958               | Egypt                    | Luxor                       |
| V24-P15        | Unidentified                        | 466                   | S(30); W(436)         | 1971               | Sri Lanka                | Sigiriya (Central Province) |

**Table S23.** Termite specimens from Springhetti Collection. Jar 26, foreign termites from Africa, unidentified. Abbreviation as in Table S1.

| Test tube code | Number of individuals | Caste  | Year of collection | State  | Locality                |
|----------------|-----------------------|--------|--------------------|--------|-------------------------|
| V26-P01        | 136                   | A(136) | 1952               | Uganda | Agoro (Northern Region) |

**Table S24.** Termite specimens from Springhetti Collection. Jar 29, foreign termites from Africa, America and Asia. The species are mostly unidentified. All abbreviations as in Table S1.

| Test tube code | Taxon                       | Number of individuals | Castes                | Year of collection | State     | Locality                  |
|----------------|-----------------------------|-----------------------|-----------------------|--------------------|-----------|---------------------------|
| V29-P01        | Unidentified                | 14                    | S(4); W(10)           | --                 | Egypt     | Imbaba (Giza Governorate) |
| V29-P02        | Unidentified                | 70                    | S(70)                 | 1952               | Uganda    | --                        |
| V29-P03        | Unidentified                | 101                   | S(3); W(98)           | 1958               | Brazil    | --                        |
| V29-P04        | Unidentified                | 126                   | S(82); W(44)          | --                 | Bahama    | --                        |
| V29-P05        | Unidentified                | 239                   | S(222); W(17)         | 1954               | Filippine | Manila                    |
| V29-P06        | <i>Cornitermes cumulans</i> | 702                   | N(37); S(201); W(464) | 1958               | Brazil    | São Paulo                 |
| V29-P07        | Unidentified                | 80                    | N(14); S(3); W(63)    | 1953               | Brazil    | --                        |

**Table S25.** Termite specimens from Springhetti Collection. Jar 30, foreign termites (mostly of the family Termitidae) from Africa, Asia, America and Oceania. All abbreviations as in Table S1.

| Test tube code | Taxon                              | Number of individuals | Castes                     | Year of collection | State                    | Locality                     |
|----------------|------------------------------------|-----------------------|----------------------------|--------------------|--------------------------|------------------------------|
| V30-P01        | Unidentified                       | 9                     | A(9)                       | 1953               | Uganda                   | Jinja (Eastern Region)       |
| V30-P02        | Unidentified                       | 12                    | A(4); S(3); W(5)           | 1963?              | Australia                | --                           |
| V30-P03        | Unidentified                       | 78                    | A(9); S(29); W(40)         | 1953               | Pakistan                 | --                           |
| V30-P04        | <i>Bellicositermes bellicosus?</i> | 13                    | S(10); W(3)                | 1953               | Senegal                  | --                           |
| V30-P05        | Unidentified                       | 15                    | S(6); W(9)                 | 1953               | Kenya                    | --                           |
| V30-P06        | Unidentified                       | 1                     | R(1)                       | 1957               | Brazil                   | --                           |
| V30-P07        | <i>Bellicositermes goliath?</i>    | 13                    | A(3); S(5); W(5)           | 1953               | Central African Republic | --                           |
| V30-P08        | <i>Bellicositermes goliath?</i>    | 13                    | S(9); W(4)                 | 1953               | Central African Republic | --                           |
| V30-P09        | <i>Bellicositermes natalensis?</i> | 25                    | S(25)                      | 1952               | Sierra Leone             | --                           |
| V30-P10        | Unidentified                       | 1                     | R(1)                       | 1953               | Central African Republic | --                           |
| V30-P11        | <i>Cornitermes cumulans</i>        | 1                     | R(1)                       | 1957               | Brazil                   | --                           |
| V30-P12        | <i>Bellicositermes jeanneli?</i>   | 16                    | S(13); W(3)                | 1952               | Uganda                   | --                           |
| V30-P13        | <i>Odontotermes tanganicus?</i>    | 11                    | S(6); W(5)                 | 1952               | Tanzania                 | --                           |
| V30-P14        | <i>Bellicositermes ukuzii</i>      | 12                    | S(10); W(2)                | 1954               | Mozambique               | Zambezia Province            |
| V30-P15        | Unidentified                       | 14                    | S(7); W(7)                 | 1972               | Etiopia                  | Hawassa (Sidama Region)      |
| V30-P16        | <i>Bellicositermes natalensis?</i> | 35                    | S(5); W(30)                | 1952               | Uganda                   | --                           |
| V30-P17        | Unidentified                       | 50                    | S(6); W(44)                | 1953               | Filippine                | Manila                       |
| V30-P18        | Unidentified                       | 37                    | S(2); W(35)                | 1952               | Central African Republic | --                           |
| V30-P19        | Unidentified                       | 70                    | N(2); S(14); W(54)         | 1952               | Sierra Leone             | --                           |
| V30-P20        | Unidentified                       | 287                   | A(1); N(276); S(2); W(8)   | 1955               | Argentina                | Formosa (Formosa Department) |
| V30-P21        | Unidentified                       | 16                    | S(16)                      | 1954               | Filippine                | Manila                       |
| V30-P22        | Unidentified                       | 12                    | S(5); W(7)                 |                    | --                       | --                           |
| V30-P23        | Unidentified                       | 37                    | W(37)                      | 1954               | Japan                    | Tokyo                        |
| V30-P24        | Unidentified                       | 96                    | S(87); W(9)                | 1965               | Panama                   | Parque Lefevre               |
| V30-P25        | Unidentified                       | 20                    | S(13); W(7)                | 1964               | Panama                   | --                           |
| V30-P26        | <i>Reticulitermes lucifugus?</i>   | 68                    | A(28); N(15); S(12); W(13) | --                 | --                       | --                           |
| V30-P27        | Unidentified                       | 52                    | N(16); S(12); W(24)        | 1952               | Sierra Leone             | --                           |
| V30-P28        | Unidentified                       | 85                    | S(5); W(80)                | 1955               | Argentina                | Formosa (Formosa Department) |
| V30-P29        | Unidentified                       | 55                    | N(3); S(12); W(40)         | 1955               | Argentina                | --                           |
| V30-P30        | <i>Odontotermes tanganicus?</i>    | 68                    | A(4); S(4); W(60)          | 1953               | Kenya                    | --                           |

**Table S26.** Termite specimens from Springhetti Collection. Jar 31, foreign termites from Africa and Asia. All abbreviations as in Table S1.

| Test tube code | Taxon                            | Number of individuals | Castes               | Year of collection | State   | Locality                        |
|----------------|----------------------------------|-----------------------|----------------------|--------------------|---------|---------------------------------|
| V31-P01        | Unidentified                     | 215                   | S(109); W(106)       | 1959               | Senegal | Bambey (Diourbel Region)        |
| V31-P02        | Unidentified                     | 123                   | A(17); S(34); W(72)  | 1952               | Uganda  | Jinja (Eastern Region)          |
| V31-P03        | Unidentified                     | 90                    | A(90)                | 1952               | Uganda  | Jinja (Eastern Region)          |
| V31-P04        | <i>Anacanthotermes ochraceus</i> | 32                    | W(32)                | 1959               | Egypt   | Zagazig (Sharqia Governorate)   |
| V31-P05        | Unidentified                     | 42                    | S(31); W(11)         | 1959               | Senegal | Bambey (Diourbel Region)        |
| V31-P06        | Unidentified                     | 261                   | R(2); S(95); W(164)  | 1959               | Senegal | Bambey (Diourbel Region)        |
| V31-P07        | Unidentified                     | 121                   | N(14); S(11); W(96)  | 1952               | Zambia  | --                              |
| V31-P08        | <i>Amitermes desertorum?</i>     | 390                   | A(160); W(230)       | 1958               | Egypt   | Mansoura (Dakahlia Governorate) |
| V31-P09        | Unidentified                     | 144                   | S(96); W(48)         | 1959               | Senegal | Bambey (Diourbel Region)        |
| V31-P10        | Unidentified                     | 157                   | S(89); W(68)         | 1960               | Senegal | Bambey (Diourbel Region)        |
| V31-P11        | <i>Psammotermes assuanensis</i>  | 257                   | A(90); W(167)        | 1959               | Egypt   | Ain Shams (Cairo Governorate)   |
| V31-P12        | Unidentified                     | 223                   | A(39); N(14); W(170) | 1952               | Malaysa | Sandakan (Sandakan Division)    |
| V31-P13        | Unidentified                     | 117                   | S(65); W(52)         | 1959               | Senegal | Bambey (Diourbel Region)        |
| V31-P14        | <i>Amitermes desertorum?</i>     | 242                   | A(164); W(78)        | 1959               | Egypt   | Mansoura (Dakahlia Governorate) |
| V31-P15        | <i>Amitermes desertorum?</i>     | 273                   | N(3); W(270)         | 1958               | Egypt   | Mansoura (Dakahlia Governorate) |

**Table S27.** Termite specimens from Springhetti Collection. Jar 32, foreign termites from Africa, Asia, America and Europe. All abbreviations as in Table S1.

| Test tube code | Taxon                              | Number of individuals | Castes             | Year of collection | State                            | Locality           |
|----------------|------------------------------------|-----------------------|--------------------|--------------------|----------------------------------|--------------------|
| V32-P01        | <i>Thoracotermes macrothorax</i>   | 30                    | N(5); S(5); W(20)  | 1957               | Democratic Republic of the Congo | Yangambi-Kisangani |
| V32-P02        | Unidentified                       | 62                    | N(2); S(26); W(34) | 1960               | Brazil                           | --                 |
| V32-P03        | <i>Ophiotermes mirandus</i>        | 31                    | S(1); W(30)        | 1957               | Democratic Republic of the Congo | Yangambi-Kisangani |
| V32-P04        | <i>Apilitermes longiceps</i>       | 33                    | S(5); W(28)        | 1957               | Democratic Republic of the Congo | Yangambi-Kisangani |
| V32-P05        | <i>Bellicositermes convexus?</i>   | 8                     | S(8)               | 1952               | Sierra Leone                     | --                 |
| V32-P06        | <i>Eutermes aethiops</i>           | 32                    | S(15); W(17)       | 1957               | Democratic Republic of the Congo | Yangambi-Kisangani |
| V32-P07        | <i>Eutermes incurvus</i>           | 30                    | S(12); W(18)       | 1957               | Democratic Republic of the Congo | Yangambi-Kisangani |
| V32-P08        | <i>Cubitermes gibbifrons</i>       | 25                    | A(1); S(7); W(17)  | 1958               | Democratic Republic of the Congo | Yangambi-Kisangani |
| V32-P09        | Unidentified                       | 4                     | A(4)               | 1922               | Sumatra                          | Fort de Kock       |
| V32-P10        | <i>Archotermopsis wroughtoni</i>   | 2                     | W(2)               | --                 | India                            | --                 |
| V32-P11        | Unidentified                       | 21                    | S(13); W(8)        | 1960               | Brazil                           | --                 |
| V32-P12        | Unidentified                       | 34                    | S(22); W(12)       | 1961               | Brazil                           | --                 |
| V32-P13        | Unidentified                       | 36                    | P(35); S(1)        | 1960               | Spain                            | Murcia             |
| V32-P14        | Unidentified                       | 15                    | S(2); W(13)        | 1954               | Filippine                        | Manila             |
| V32-P15        | Unidentified                       | 51                    | S(49); W(2)        | 1960               | Brazil                           | --                 |
| V32-P16        | Unidentified                       | 9                     | A(9)               | 1953               | Central African Republic         | --                 |
| V32-P17        | <i>Pericapritermes heteronotus</i> | 25                    | S(10); W(15)       | 1957               | Democratic Republic of the Congo | Yangambi-Kisangani |
| V32-P18        | Unidentified                       | 65                    | N(2); W(63)        | 1961               | Costa Rica                       | --                 |
| V32-P19        | Unidentified                       | 182                   | S(182)             | 1961               | Costa Rica                       | --                 |

**Table S28.** Termite specimens from Springhetti Collection. Jar 33, foreign termites (mostly of the family Termitidae) from Africa, Asia and America. All abbreviations as in Table S1.

| Test tube code | Taxon                              | Number of individuals | Castes                   | Year of collection | State                            | Locality                    |
|----------------|------------------------------------|-----------------------|--------------------------|--------------------|----------------------------------|-----------------------------|
| V33-P01        | <i>Macrotermes natalensis</i>      | 5                     | A(5)                     | 1948               | Democratic Republic of the Congo | --                          |
| V33-P02        | <i>Syntermes spinosus</i>          | 27                    | N(1); S(6); W(20)        | 1920               | Guyana                           | Kartabo (Cuyuni-Mazaruni)   |
| V33-P03        | <i>Thoracotermes macrothorax</i>   | 5                     | S(4); W(1)               | --                 | --                               | --                          |
| V33-P04        | <i>Macrotermes natalensis?</i>     | 17                    | S(15); W(2)              | --                 | --                               | --                          |
| V33-P05        | Unidentified                       | 10                    | A(8); N(2)               | 1953               | Argentina                        | Tucumán Province            |
| V33-P06        | <i>Microtermes fuscofemoralis</i>  | 7                     | S(6); W(1)               | --                 | --                               | --                          |
| V33-P07        | <i>Acanthotermes acanthothorax</i> | 17                    | S(12); W(5)              | --                 | --                               | --                          |
| V33-P08        | Unidentified                       | 52                    | S(3); W(49)              | 1981               | USA                              | California<br>Mansura       |
| V33-P09        | <i>Amitermes desertorum?</i>       | 31                    | A(8); S(1); W(22)        | 1959               | Egypt                            | (Dakahlia Governorate)      |
| V33-P10        | Unidentified                       | 19                    | A(6); N(2); W(11)        | 1953               | Argentina                        | Tucumán Province            |
| V33-P11        | Unidentified                       | --                    | Eggs                     | 1953               | Argentina                        | Tucumán Province            |
| V33-P12        | <i>Capritermes padangensis</i>     | 9                     | S(3); W(6)               | 1922               | Sumatra                          | Fort de Kock (West Sumatra) |
| V33-P13        | Unidentified                       | 27                    | W(27)                    | 1953               | Argentina                        | Tucumán Province            |
| V33-P14        | Unidentified                       | 10                    | A(4); W(6)               | 1953               | Argentina                        | Tucumán Province            |
| V33-P15        | Unidentified                       | 30                    | W(30)                    | 1953               | Argentina                        | Tucumán Province            |
| V33-P16        | Unidentified                       | --                    | Eggs                     | --                 | --                               | --                          |
| V33-P17        | Unidentified                       | 11                    | S(4); W(7)               | --                 | Sierra Leone                     | --                          |
| V33-P18        | Unidentified                       | 31                    | S(15); W(16)             | 1981               | USA                              | Berkeley (California)       |
| V33-P19        | <i>Acanthotermes desertorum?</i>   | 28                    | A(11); S(4); W(13)       | 1959               | Egypt                            | --                          |
| V33-P20        | Unidentified                       | 38                    | S(23); W(15)             | 1953               | Argentina                        | Tucumán Province            |
| V33-P21        | Unidentified                       | 112                   | S(60); W(52)             | 1953               | Argentina                        | Tucumán Province            |
| V33-P22        | <i>Amitermes desertorum?</i>       | 36                    | A(17); S(3); W(16)       | 1959               | Egypt                            | --                          |
| V33-P23        | <i>Nasutitermes</i> sp             | 130                   | A(2); N(3); S(3); W(122) | 1953               | Argentina                        | Tucumán Province            |
| V33-P24        | Unidentified                       | 83                    | N(11); W(72)             | 1953               | Argentina                        | Tucumán Province            |
| V33-P25        | <i>Nasutitermes</i> sp             | 68                    | S(18); W(50)             | 1953               | Argentina                        | Tucumán Province            |
| V33-P26        | <i>Nasutitermes</i> sp.            | 16                    | S(16)                    | 1953               | Argentina                        | Tucumán Province            |
| V33-P27        | Unidentified                       | 13                    | S(11); W(2)              | --                 | --                               | --                          |
| V33-P28        | Unidentified                       | 257                   | S(77); W(180)            | 1961               | Costa Rica                       | --                          |
| V33-P29        | <i>Nasutitermes</i> sp.            | 50                    | S(28); W(22)             | 1953               | Argentina                        | Tucumán Province            |



**Table S29.** Termite specimens from Springhetti Collection. Jar 34, foreign termites (mostly of the family Termitidae) from Africa, Asia and Oceania. All abbreviations as in Table S1.

| Test tube code | Taxon        | Number of individuals | Castes             | Year of collection | State                    | Locality          |
|----------------|--------------|-----------------------|--------------------|--------------------|--------------------------|-------------------|
| V34-P01        | Unidentified | 16                    | S(15); W(1)        | 1954               | Mozambique               | Zambezia Province |
| V34-P02        | Unidentified | 43                    | S(39); W(4)        | 1956               | Filippine                | --                |
| V34-P03        | Unidentified | 354                   | S(354)             | 1952               | Uganda                   | --                |
| V34-P04        | Unidentified | 72                    | S(72)              | 1952               | Sierra Leone             | --                |
| V34-P05        | Unidentified | 177                   | S(51); W(126)      | 1956               | New Guinea island        | --                |
| V34-P06        | Unidentified | 130                   | S(71); W(59)       | 1952               | Sierra Leone             | --                |
| V34-P07        | Unidentified | 181                   | A(181)             | 1952               | Central African Republic | --                |
| V34-P08        | Unidentified | 203                   | A(7); S(1); W(195) | 1956               | New Guinea island        | --                |
| V34-P09        | Unidentified | 199                   | S(31); W(168)      | 1956               | New Guinea island        | --                |
| V34-P10        | Unidentified | 188                   | S(63); W(125)      | --                 | --                       | --                |

**Table S30.** Termite specimens from Springhetti Collection. Jar 37, foreign termites (belonging to 6 families) from all continents. All abbreviations as in Table S1.

| Test tube code | Taxon                              | Number of individuals | Castes             | Year of collection | State                            | Locality                        |
|----------------|------------------------------------|-----------------------|--------------------|--------------------|----------------------------------|---------------------------------|
| V37-P01        | Unidentified                       | 1                     | R(1)               | 1952               | Uganda                           | --                              |
| V37-P02        | Unidentified                       | 5                     | R(1); S(4)         | 1952               | Uganda                           | --                              |
| V37-P03        | Unidentified                       | 2                     | R(2)               | 1952               | Uganda                           | --                              |
| V37-P04        | <i>Mastotermes darwiniensis?</i>   | 1                     | A(1)               | --                 | --                               | --                              |
| V37-P05        | <i>Bellicositermes natalensis</i>  | 7                     | S(7)               | --                 | Central African Republic         | --                              |
| V37-P06        | Unidentified                       | 23                    | A(7); S(5); W(11)  | 1952               | Sierra Leone                     | --                              |
| V37-P07        | <i>Mastotermes darwiniensis</i>    | 14                    | N(14)              | 1953               | Australia                        | --                              |
| V37-P08        | <i>Zootermopsis angusticollis</i>  | 5                     | S(3); W(2)         | 1962               | --                               | --                              |
| V37-P09        | <i>Zootermopsis nevadensis</i>     | 6                     | A(5); S(1)         | 1937               | USA                              | Camino (California)             |
| V37-P10        | Unidentified                       | 4                     | R(4)               | 1952               | Zimbabwe                         | --                              |
| V37-P11        | <i>Mastotermes darwiniensis</i>    | 41                    | W(41)              | --                 | Australia                        | --                              |
| V37-P12        | <i>Odontotermes culturatum</i>     | 16                    | S(5); W(11)        | 1953               | Kenya                            | --                              |
| V37-P13        | <i>Anacanthotermes ochraceus</i>   | 13                    | S(4); W(9)         | 1959               | Egypt                            | Cairo Governorate               |
| V37-P14        | <i>Anacanthotermes ochraceus</i>   | 34                    | S(4); W(30)        | 1959               | Egypt                            | Hawsh Isa (Beheira Governorate) |
| V37-P15        | <i>Anacanthotermes ochraceus</i>   | 21                    | S(3); W(18)        | 1959               | Egypt                            | Zagazig (Sharqia Governorate)   |
| V37-P16        | <i>Anacanthotermes ochraceus</i>   | 21                    | A(10); S(1); W(10) | 1959               | Egypt                            | Abu-Rawash (Cairo Governorate)  |
| V37-P17        | <i>Lacessitermes nemorosus</i>     | 28                    | S(9); W(19)        | --                 | Sumatra                          | --                              |
| V37-P18        | <i>Anacanthotermes ochraceus?</i>  | 32                    | A(1); W(31)        | 1958               | Egypt                            | Damanhur (Beheira Governorate)  |
| V37-P19        | <i>Mastotermes darwiniensis</i>    | 5                     | S(5)               | 1953               | Australia                        | --                              |
| V37-P20        | Unidentified                       | 13                    | R(13)              | 1952               | Sierra Leone                     | --                              |
| V37-P21        | <i>Lacessitermes nemorosus</i>     | 142                   | S(44); W(98)       | --                 | Sumatra                          | --                              |
| V37-P22        | <i>Cryptotermes brevis</i>         | 10                    | A(7); W(3)         | 1952               | Portugal                         | Madera                          |
| V37-P23        | <i>Macrotermes natalensis</i>      | 1                     | A(1)               | 1948               | Democratic Republic of the Congo | Niangara (Haut-Uélé)            |
| V37-P24        | <i>Lacessititermes jacobsoni</i>   | 24                    | R(1); S(11); W(12) | --                 | Sumatra                          | --                              |
| V37-P25        | <i>Capritermes padongensis</i>     | 47                    | S(1); W(46)        | 1930               | Sumatra                          | Fort de Kock (West Sumatra)     |
| V37-P26        | <i>Macrotermes muelleri</i>        | 3                     | S(3)               | --                 | Ghana                            | --                              |
| V37-P27        | <i>Cubitermes bilobatus</i>        | 5                     | A(5)               | 1959               | Tanzania                         | --                              |
| V37-P28        | Unidentified                       | 5                     | A(5)               | --                 | --                               | --                              |
| V37-P29        | <i>Cubitermes tanganicus?</i>      | 5                     | A(5)               | 1959               | Tanzania                         | Ifakara (Kilombero District)    |
| V37-P30        | <i>Coactotermes coarctatus?</i>    | 5                     | S(5)               | --                 | Somalia                          | Lower Juba (Jubaland)           |
| V37-P31        | <i>Lacessititermes jacobsoni</i>   | 9                     | S(5); W(4)         | --                 | Sumatra                          | --                              |
| V37-P32        | Unidentified                       | 70                    | S(9); W(61)        | 1953               | Argentina                        | Tucumán Province                |
| V37-P33        | <i>Schedorhinotermes javanicus</i> | 162                   | S(35); W(127)      | --                 | Sumatra                          | Fort de Kock (West Sumatra)     |
| V37-P34        | Unidentified                       | 39                    | W(39)              | --                 | --                               | --                              |

**Table S31.** Termite specimens from Springhetti Collection. Jar 38, foreign termites (unidentified) from Africa. All abbreviations as in Table S1.

| Test tube code | Number of individuals | Caste                    | Year of collection | State    | Locality              |
|----------------|-----------------------|--------------------------|--------------------|----------|-----------------------|
| V38-P01        | 35                    | S(2); W(33)              | 1989               | Somalia  | Mogadiscio (Banaadir) |
| V38-P02        | 11                    | S(4); W(7)               | 1989               | Somalia  | Mogadiscio (Banaadir) |
| V38-P03        | 93                    | A(13); N(2); S(3); W(75) | 1989               | Somalia  | Mogadiscio (Banaadir) |
| V38-P04        | 66                    | A(10); S(1); W(55)       | 1989               | Somalia? | --                    |
| V38-P05        | 3                     | A(3)                     | 1989               | Somalia  | Mogadiscio (Banaadir) |
| V38-P06        | 10                    | S(4); W(6)               | --                 | --       | --                    |
| V38-P07        | 19                    | S(5); W(14)              | 1989               | Somalia  | --                    |
| V38-P08        | 51                    | S(3); W(48)              | 1989               | Somalia  | --                    |
| V38-P09        | 102                   | S(7); W(95)              | 1989               | Somalia  | --                    |
| V38-P10        | 125                   | A(1); S(8); W(116)       | 1989               | Somalia  | --                    |
| V38-P11        | 39                    | S(13); W(26)             | 1989               | Somalia  | --                    |
| V38-P12        | 92                    | S(9); W(83)              | 1989               | Somalia  | --                    |
| V38-P13        | 14                    | A(14)                    | 1989               | Somalia  | Mogadiscio (Banaadir) |
